# Supplementary material
Source: PubMed Central journal article supplement (PMC1955382)
Supplement: NIHMS27680-supplement-supp.pdf [file NIHMS27680-supplement-supp.pdf]

## **Riz *et al.*, Supplementary Information**

### **Supplementary Results**

#### *Derivation of iEBHXIS-4 erythroid progenitor cells from an ESC line with inducible TLX1 expression*

We previously reported that enforced expression of *TLX1* in murine ESCs subjected to *in vitro* differentiation frequently results in the immortalization of various myeloerythroid precursors (Keller *et al.*, 1998). Therefore, to further investigate the mechanism of the *TLX1*-induced differentiation block, we were interested in extending this latter approach using an ESC line in which *TLX1* expression could be reversibly controlled. To obviate the possibility of interfering oncogenes being inadvertently activated by retroviral insertional mutagenesis (Du *et al.*, 2005), which could complicate interpretation of the results, we sought a less genotoxic strategy to achieve this goal. Toward this end, a *TLX1* loxP-targeting vector (plox*TLX1*) was generated by subcloning a *TLX1*-IRES-EGFP cassette into the plox plasmid (Kyba *et al.*, 2002) (Supplementary Figure 1a). The “Tet-on” target ESC line Ainv15 was electroporated with plox*TLX1* and the pSalk-Cre Cre recombinase expression plasmid, resulting in site-specific integration of the *TLX1*-IRES-EGFP cassette downstream of a promoter integrated into the *hprt* locus that is responsive to the tetracycline derivative doxycycline (Supplementary Figure 1b). The ESC lines with doxycycline-inducible *TLX1* expression that were established have been denoted i*TLX1*, following the nomenclature of Daley and colleagues (Kyba *et al.*, 2002). To determine whether *TLX1*(GFP) expression was reversibly regulated in the i*TLX1* ESC line chosen for further study (TG7), the cells were cultured in the presence or absence of 1 µg/ml doxycycline. After 3 days in doxycycline-supplemented medium, GFP expression was detected by fluorescence microscopy (Supplementary Figure 1c) and flow cytometric analysis (Supplementary Figure 1d), and *TLX1* expression was detected by Western blot analysis

(Supplementary Figure 1e). More importantly, coordinate down-regulation of TLX1 and GFP expression was observed when iTLX1 cells were subsequently cultured in the absence of doxycycline for 3 days (Supplementary Figure 1d,e). Thus, *TLX1*(GFP) expression is tightly regulated in the iTLX1 ESC line TG7 by the addition and removal of doxycycline.

Embryoid bodies were generated from iTLX1 ESCs essentially as described previously (Keller *et al.*, 1998) except that doxycycline was added at 1  $\mu$ g/ml on day 4 of differentiation (Supplementary Figure 1f). After an additional 2 days of culture, iTLX1 embryoid bodies were dissociated and assayed for hematopoietic colony formation in methylcellulose-containing cultures supplemented with doxycycline. Colonies that developed were picked, transferred to liquid cultures, and propagated in the presence of interleukin-3 (IL-3), stem cell factor (SCF) and erythropoietin (Epo) (Keller *et al.*, 1998) plus or minus doxycycline. The iEBHX1S-4 clonal cell line was established from an embryoid body-derived hematopoietic cell culture that continued to proliferate (>6 months) in the presence of doxycycline.

Although the iEBHX1S-4 cell line was generated in the presence of IL-3, SCF and Epo, the cells showed no significant growth response to Epo, either alone or in pairwise combinations with IL-3 or SCF when maintained in the presence of doxycycline, but required IL-3 plus SCF for survival and proliferation (Supplementary Figure 1g). However, because the cells express Epo receptor mRNA (EpoR; see below), they are routinely maintained in IL-3, SCF and Epo (Supplementary Figure 2a). Notably, 3 days after removal of doxycycline from iEBHX1S-4 cultures, the majority of the cells became positive after benzidine staining, indicative of hemoglobin synthesis (Supplementary Figure 2b). Addition of bovine serum albumin, insulin and transferrin (Iscove *et al.*, 1980; Kurtz *et al.*, 1983) to doxycycline-minus cultures resulted in a greater percentage of cells exhibiting the features of terminal erythroid maturation, including enucleation (Supplementary Figure 2c). To further investigate the factor requirements of the

iEBHX1S-4 erythroid differentiative response, doxycycline was removed and the cells were cultured in the presence of various combinations of IL-3, SCF and Epo. The results shown in Supplementary Figure 2d demonstrated that Epo was necessary and sufficient for erythroid differentiation of iEBHX1S-4 cells following release of the TLX1-mediated block.

Flow cytometric analysis indicated that a subset of iEBHX1S-4 cells expressed the glycophorin A-associated surface antigen TER119 first detectable around the early proerythroblast stage of differentiation (Kina *et al.*, 2000), the percentage of which increased significantly 3 days after doxycycline withdrawal (Supplementary Figure 2e). Examination of genes known to be involved in erythropoiesis (Cantor and Orkin, 2002) by semi-quantitative RT-PCR showed that iEBHX1S-4 cells expressed mRNAs coding for the SCF receptor (c-Kit), EpoR, c-Myb and GATA-1 (Supplementary Figure 2f). In addition, embryonic (hbb-bH1/ $\beta$ H1) as well as adult (hbb-b1/ $\beta$ major)  $\beta$ -globin mRNA could be detected (Supplementary Figure 2f), indicating that the iEBHX1S-4 cell line was of embryonic erythroid origin (Keller *et al.*, 1998). Three days after doxycycline withdrawal, when the cells exhibited a decreased rate of proliferation (data not shown), down-regulation of c-kit and c-myb mRNAs was observed concomitant with up-regulation of Gata-1 transcripts (Supplementary Figure 2f);  $\beta$ -globin mRNA levels were also moderately increased at the 3-day time point (Supplementary Figure 2f). Previous studies have implicated the cyclin-dependent kinase inhibitor p27<sup>Kip1</sup> but not p21<sup>Waf1/Cip1</sup> in the growth arrest that accompanies terminal erythroid maturation (Hsieh *et al.*, 2000; Rylski *et al.*, 2003). Steady-state levels of the p27<sup>Kip1</sup> had significantly increased by 24 hours after doxycycline withdrawal whereas there was no significant increase in the levels of p21<sup>Waf1/Cip1</sup> at the 24-hour time point (Supplementary Figure 2g). In aggregate, the data suggested that iEBHX1S-4 cells were conditionally-arrested by *TLX1* just prior to or at an early proerythroblast-like stage of erythropoiesis (Zon *et al.*, 1991; Kapur and Zhang, 2001; Koury *et*

*al.*, 2002). iEBHX1S-4 cells thus share properties with GATA-1-null G1E erythroid cells, which proliferate in an SCF-dependent manner and, upon restoration of GATA-1 function, undergo Epo-dependent terminal maturation (Weiss *et al.*, 1997; Hung *et al.*, 1999).

#### *Bioinformatic promoter analysis of conditionally-regulated iEBHX1S-4 gene sets*

Over-represented motifs within promoter regions were compiled by three different methods based on transcription factor motif matrices or *ab initio* motif discovery algorithms (Matys *et al.*, 2003; Frith *et al.*, 2004; Mariño-Ramírez *et al.*, 2004; Tharakaraman *et al.*, 2005) (see Materials and Methods). Two motifs, the CCAAT box and the motif recognized by “CAC-binding protein”, were specifically over-represented in the promoters of the genes belonging to the up-regulated “Figure 1c subtrees”, Ccne1-like, Hba-x-like and Hemgn-like gene sets (Supplementary Tables 8-11) but were not present above random expectation in the promoter regions of the genes belonging to the transiently up-regulated Apobec2-like gene set (Supplementary Table 12) or in the promoters of any of the genes from the two down-regulated gene sets (Supplementary Tables 13 and 14). Both elements have been shown to be important for developmental regulation of various globin genes (Miller and Bieker, 1993; Sabath *et al.*, 1998; Tewari *et al.*, 1998; Asano *et al.*, 1999; Basu *et al.*, 2005). In particular, they were demonstrated to be of functional relevance for *Hba-x/ζ*-globin expression (Sabath *et al.*, 1998). There are a number of transcription factors that recognize a CCAAT core sequence as part of their binding site, including NF-Y (Cohen *et al.*, 1986; Barnhart *et al.*, 1988) and C/EBP $\gamma$  (Zafarana *et al.*, 2000), which are expressed in iEBHX1S-4 cells. The “CAC-binding protein” motif is recognized by the Krüppel-like transcription factors (KLFs) (Bieker, 2001). EKLF/KLF1 – the first of 16 KLFs to be identified, which is expressed in iEBHX1S-4 cells – recognizes the CAC motif in the  $\beta$ -globin promoter (Miller and Bieker, 1993) and functionally and physically interacts with

GATA-1 (Merika and Orkin, 1995). In addition, KLF1 has been implicated as a regulator of *Hemgn*/hemogen expression (Drissen *et al.*, 2005) and other genes required for the terminal maturation and hemoglobinization of erythroid cells (Coghill *et al.*, 2001; Drissen *et al.*, 2005).

In addition to the CCAAT and CAC-binding protein motifs, a bipartite “E-box-GATA” motif was found to be selectively over-represented in the promoter regions of the up-regulated *Ccne1*-like and *Hba-x*-like gene sets (Supplementary Tables 9 and 10). The motif, which consists of an E-box (CAGGTG) followed ~9 bp downstream by a GATA site, is recognized by an erythroid DNA-binding complex containing SCL and GATA-1 linked by LMO2 (Wadman *et al.*, 1997). The SCL-LMO2-GATA-1 complex activates expression of erythroid-lineage genes such as the red cell membrane proteins glycophorin A (recognized by the TER119 antibody) and protein 4.2, during terminal maturation (Xu *et al.*, 2003; Lahlil *et al.*, 2004). Additionally, when the up-regulated “Figure 1c subtrees” gene set was searched for positionally-clustered “word” combinations, the TGATTG sequence was found to cluster ~50 bp upstream of the transcriptional start sites ( $P < 0.002$ ) (Supplementary Table 15). This motif corresponded to an atypical GATA-1 site which is present in the  $\beta$ -globin promoter at -266 (Barnhart *et al.*, 1989).

By comparison, bioinformatic analysis of the promoter regions of the transiently up-regulated *Apobec2*-like gene set revealed the exclusive over-representation of a Gfi-1b motif (Tong *et al.*, 1998) (Supplementary Table 12). Gfi (growth factor-independence)-1b is a zinc-finger transcriptional repressor that is essential for erythropoiesis and governs the proliferation of erythroid progenitors *in vitro* (Saleque *et al.*, 2002; Garcon *et al.*, 2005; Rodriguez *et al.*, 2005).

A common feature of all of the transcription factors implicated through the bioinformatic analysis is that their transcriptional activity is regulated by CBP (Blobel *et al.*, 1998; Boyes *et al.*, 1998; Huang *et al.*, 1999; Hung *et al.*, 1999; Zhang and Bieker, 1998; Zhang *et al.*, 2001). Specifically, acetylation of GATA-1 (Blobel *et al.*, 1998; Boyes *et al.*, 1998; Hung *et al.*, 1999),

KLF1 (Zhang and Bieker, 1998; Zhang *et al.*, 2001), NF-Y (Faniello *et al.*, 1999; Duan *et al.*, 2001), C/EBP family members (Mink *et al.*, 1997; Kovacs *et al.*, 2003) and SCL (Huang *et al.*, 1999) by CBP has been demonstrated to potentiate their transcriptional activity. Moreover, CBP acetylation of SCL correlates with disruption of SCL-ETO-2-Gfi-1b complexes – implicated in the transcription of the transiently up-regulated Apobec2-like gene set – during erythroid differentiation (Huang *et al.*, 1999; Schuh *et al.*, 2005).

## Supplementary Materials and Methods

### *Cell lines and culture conditions*

Mouse ESCs were co-cultured with G418-resistant primary mouse embryonic fibroblasts (Specialty Media, Phillipsburg, NJ) on gelatinized 35 mm tissue culture dishes. ESC maintenance medium consisted of Dulbecco's modified Eagle medium supplemented with 4.5 g/l glucose (Invitrogen Corp., Carlsbad, CA), 15% fetal bovine serum (FBS; BioWhittaker, Walkersville, MD), 10% leukemia inhibitory factor-conditioned medium from Chinese hamster ovary cells transfected with a leukemia inhibitory factor expression vector (Keller *et al.*, 1998), 1 mM sodium pyruvate, 0.1 mM non-essential amino acids, 2 mM L-glutamine, 100 U/ml penicillin, 100 µg/ml streptomycin, 100 µM monothioglycerol (Sigma-Aldrich Corp., St. Louis, MO). Cells were passaged every 3 days and maintained ( $8 \times 10^4$  to  $1.5 \times 10^6$  cells per dish) at 37°C in a humidified atmosphere containing 5% CO<sub>2</sub> (Kyba *et al.*, 2002).

Human 293T embryonic kidney cells (293T/17, CRL-11268; American Type Culture Collection, Manassas, VA) were cultured in DMEM supplemented with 4.5 g/l glucose plus 10% FBS.

### *Construction of the ploxTLX1 plasmid and generation of the TLX1-inducible ESC line*

The ploxTLX1 targeting plasmid was generated by cloning a TLX1-IRES-EGFP *EcoRI-SalI* fragment into corresponding *EcoRI* and *SalI* sites of the plasmid plox. The doxycycline-inducible targeting ESC line Ainv15 was electroporated (270 V, 960 µF; Gene Pulser II, BioRad Laboratories, Hercules, CA) in the presence of 100 µg ploxTLX1 targeting plasmid and 20 µg pSalk-Cre Cre recombinase expression plasmid in electroporation buffer (Specialty Media). The Ainv15 cell line and the Cre-lox plasmids were gifts from Dr. George Daley (Children's Hospital Boston, Boston, MA) (Kyba *et al.*, 2002). Electroporated ESCs were co-cultured with

G418-resistant primary mouse embryonic fibroblasts in ESC maintenance medium supplemented with 500 µg/ml G418 (Invitrogen Corp.). Individual G418-resistant ESC colonies were picked and expanded, and examined by polymerase chain reaction (PCR) for confirmation of successful integration of the ploxTLX1 targeting plasmid. The primers used for PCR consisted of sequences within the ploxTLX1 targeting plasmid (*pgk* promoter region) and within the *neo* gene in the parental Ainv15 ESC line that would generate a 450 bp product. Primers: LoxinF 5'-CTAGATCTCGAAGGATCTGGAG-3', LoxinR 5'-ATACTTTCTCGGCAGGAGCA-3'. PCR conditions: 10 min at 95°C; 40 cycles of 15 sec at 95°C, 40 sec at 58°C and 1 min at 72°C; 5 min at 72°C.

*Embryoid body formation, hematopoietic cell differentiation and iEBHXIS-4 erythroid progenitor cell line derivation*

Two days prior to embryoid body formation, ESCs were placed in ESC maintenance medium containing Iscove's modified Dulbecco's medium (IMDM; Invitrogen Corp.) instead of Dulbecco's modified Eagle medium. Embryoid body formation was induced as described (Keller *et al.*, 1998), with slight modifications according to a protocol provided by StemCell Technologies (Vancouver, BC, Canada). ESCs were mixed with ES-Cult™ methylcellulose (StemCell Technologies) supplemented with 40 ng/ml SCF (PeproTech, Inc., Rocky Hill, NJ) and 150 µM monothioglycerol, seeded in 35 mm suspension dishes (StemCell Technologies) at a density of  $5 \times 10^3$  cells/ml, and maintained at 37°C in a humidified atmosphere containing 5% CO<sub>2</sub>. Doxycycline (Sigma-Aldrich Corp.) in 0.5 ml ES-CULT medium was added to the dishes at 1 µg/ml on day 4 of differentiation. Embryoid bodies were recovered on day 6 of differentiation in IMDM/2% FBS, centrifuged at 300 g for 10 min, and then disaggregated for 3



min in the presence of 0.05% trypsin/EDTA (Invitrogen Corp.). Disaggregated embryoid bodies were passed through a 21G 38 mm needle to produce a single-cell suspension.

Individual disaggregated day-6 embryoid bodies ( $4 \times 10^4$  cells) were plated in methylcellulose-based MethoCult™ GF M3434 medium (StemCell Technologies) containing 50 ng/ml SCF, 10 ng/ml IL-3 (PeproTech, Inc.), 10 ng/ml IL-6 (PeproTech, Inc.), 3 U/ml Epo (Amgen, Thousand Oaks, CA) and 1 µg/ml doxycycline. After 6 days, individual colonies were picked by pipette, washed free of methylcellulose and placed in liquid cultures containing IMDM/10% FBS, 55 µM β-mercaptoethanol (Invitrogen Corp.), 2.5% SCF-conditioned medium from Chinese hamster ovary cells transfected with a SCF expression vector (Hawley *et al.*, 1996), 5% IL-3-conditioned medium from X630-rIL3 cells, 3 U/ml Epo and 1 µg/ml doxycycline.

iEBHX1 was established as a continuously growing cell line from a single colony and single-cell sorted (from  $2 \times 10^6$  cells) based on GFP expression into 96-well plates containing the above described medium, from which the iEBHX1S-4 clone was obtained (the suffix S denotes “sorted”). Cell sorting was performed on a FACSVantage SE/FACSDiVa (BD Biosciences, San Jose, CA) instrument equipped with a CloneCyt Plus option that provides automated single-cell deposition capability. In order to examine the growth and differentiation potential of the iEBHX1S-4 cell line, its responsiveness to a variety of factors, including IL-3, SCF, Epo, thrombopoietin, IL-5, IL-6, IL-11, granulocyte-macrophage colony-stimulating factor, granulocyte colony-stimulating factor, macrophage colony-stimulating factor, vascular endothelial growth factor and basic fibroblast growth factor, was evaluated in suspension and methylcellulose cultures. iEBHX1S-4 cultures were supplemented with 5% BIT (bovine serum albumin, insulin and human transferrin; StemCell Technologies), 1 mM sodium butyrate, 0.5 mM valproic acid or 50 nM trichostatin A (Sigma-Aldrich Corp.) where noted.

### *Flow cytometric and in situ analyses*

Immunofluorescence flow cytometric analysis of iTLX1 TG7 ESCs and iEBHX1S-4 cells was performed using a BD FACSAria flow cytometer (BD Biosciences). Anti-SSEA-1 antibody was obtained from the Developmental Studies Hybridoma Bank, Department of Biological Sciences, University of Iowa (Iowa City, IA). Antibodies to Flk-1, Gr-1 (Ly-6G), Mac-1 (CD11b), CD18, CD41, CD49d (VLA-4), CD62L (L-selectin) and TER119 (Ly-76) were purchased from BD Biosciences Pharmingen (San Diego, CA). 2.4G2 rat anti-mouse CD16/CD32 monoclonal antibody (Mouse BD Fc Block™; BD Biosciences Pharmingen) was used to block FcγIII/II receptors. A rat monoclonal antibody to mouse neutrophils (clone 7/4) was purchased from Caltag Laboratories (Burlingame, CA). iTLX1 TG7 ESCs are SSEA-1<sup>+</sup>; iEBHX1S-4 cells express the CD41 surface antigen (Ferkowicz *et al.*, 2003). Benzidine staining was performed by adding 20 μl of benzidine staining solution (500 μl 0.2% benzidine in 3% acetic acid added to 50 μl H<sub>2</sub>O<sub>2</sub> immediately prior to staining) to 2 × 10<sup>4</sup> cells in 200 μl for 8 min.

### *Microarray profiling and RT-PCR*

Microarray profiling was performed in The George Washington University Medical Center Genomics Core Facility essentially as described previously (Krasnoselskaya-Riz *et al.*, 2002; Riz and Hawley, 2005). In brief, total RNA was isolated by TRIzol Reagent (Invitrogen Corp.) and further purified using RNeasy mini spin columns (QIAGEN Inc., Valencia, CA). cDNA synthesis was performed with an HPLC purified T7-(dT)24 primer (Genset Oligos/Proligo LLC, Boulder, CO). Biotin-labeled cRNA synthesis, hybridization, washing, staining and scanning were carried out according to protocols provided by Affymetrix Inc. (Santa Clara, CA). Target cRNA prepared from two independent cultures of each cell line and from two independent cultures of each iEBHX1S-4 differentiation time point was hybridized to Affymetrix MG-

U74Av2 GeneChip oligonucleotide arrays. For all relative expression value comparisons, experimental and control hybridizations were processed simultaneously.

Quality control and low-level analysis of expression data were performed using Microarray Suite 5.0 software (MAS 5.0; Affymetrix). Subsequent data analysis was performed with GeneSpring software (Silicon Genetics/Agilent Technologies, Inc., Palo Alto, CA). Unsupervised hierarchical condition tree, gene tree and K-means clustering were based on standard correlations for log-transformed data averaged for two replicates. Gene annotation queries were conducted through the Affymetrix NetAffx Analysis Center (<http://www.affymetrix.com/analysis/index.affx>) and gene sets categorized based on Gene Ontology (GO) (Ashburner *et al.*, 2000) information from the National Center for Biotechnology Information (NCBI) website (<http://www.ncbi.nlm.nih.gov/>). To compare iEBHX1S-4 differentiation expression profiles with published microarray expression data obtained for G1E cells (Welch *et al.*, 2004), profile neighbors were extracted from the NCBI GEO (Gene Expression Omnibus) DataSet (Record Accession Number GDS568) and analyzed in GeneSpring as a list of Affymetrix Probe Set IDs. Gene lists were deposited in the George Washington University List of Lists-Annotated (LOLA) database (<http://www.lola.gwu.edu>).

The expression profiles of selected genes obtained by microarray analysis were validated by real-time qRT-PCR using an ABI Prism 7000 Sequence Detection System (Krasnoselskaya-Riz *et al.*, 2002). Complementary DNA was synthesized using TaqMan reverse transcriptase and random Hexamers (Applied Biosciences, Branchburg, NJ) and amplified with the following TaqMan probe sets (Applied Biosciences) according to the manufacturer's protocol: Apobec2 (Mm00477588\_m1), Ccne1 (Mm00432367\_m1), Hba-x (Mm00439255\_m1), Hemgn (Mm00519058\_m1), and Egr1 (Mm00656724\_m1).

For semi-quantitative RT-PCR, RNA isolation was performed using the High Pure RNA Isolation Kit as per the manufacturer's protocol (Roche Diagnostics Corp., Indianapolis, IN). cDNA synthesis was performed by reverse transcription of RNA templates using the TaqMan RT Kit and random Hexamers (Applied Biosciences). PCR was performed using PCR MasterMix (Promega Corp., Madison, WI), with glyceraldehyde-3-phosphate dehydrogenase (GAPDH) as a control. Primers specific for c-kit, c-myb, EpoR, GATA-1,  $\beta$ H1-globin,  $\beta$ 1-globin and GAPDH were as previously published (Keller *et al.*, 1993). PCR conditions: 10 min at 95°C; 40 cycles of 15 sec at 95°C, 40 sec at 56°C (58 °C for c-kit and c-myb) and 30 sec at 72°C; 5 min at 72°C.

#### *Statistical identification of putative transcription factor binding sites*

Proximal promoter regions of gene sets consisted of nucleotides from -2,000 to +1000 or -2,000 to +300 relative to the corresponding transcriptional start sites, which were identified using information from the Database of Transcriptional Start Sites (DBTSS) (Yamashita *et al.*, 2006) mapped to NCBI mouse genome build 35.1. Over-represented motifs within promoter regions were identified by three different methods: (i) Using Clover (Cis-eLement OVERrepresentation) software (Frith *et al.*, 2004) and position frequency matrices derived from transcription factor binding sites from the TRANSFAC Professional database (Release 9.3) (Matys *et al.*, 2003); (ii) Using an enumerative motif finding algorithm (Mariño-Ramírez *et al.*, 2004), which applies z-scores to evaluate the over-representation of “words” with respect to transcriptional start sites; and (iii) Using an enumerative motif finding algorithm that identifies clusters of “words” unusually placed relative to transcriptional start sites (Tharakaraman *et al.*, 2005).

*Immunoprecipitations, GST pull-downs and Western blotting*

Immunoprecipitations and Western blotting were performed essentially as described previously (Owens *et al.*, 2003; Akimov *et al.*, 2005; Riz and Hawley, 2005). To prepare whole-cell lysates, cells were lysed on ice in RIPA buffer (50 mM Tris-HCl pH 7.5, 150 mM NaCl, 0.1% SDS, 0.5% Na-deoxycholate, 1 mM PMSF, 1 mM benzamidine, 10 µg/ml leupeptin, 10 µg/ml aprotinin). Insoluble materials were removed by centrifugation at 18,000g at 4°C for 20 min. To prepare nuclear lysates, cells were washed once in PBS and once in hypotonic buffer (10 mM HEPES pH 7.9, 1.5 mM MgCl<sub>2</sub>, 10 mM KCl, 1 mM PMSF, 1 mM DTT), incubated in hypotonic buffer on ice for 15 min and centrifuged at 10,000g at 4°C for 10 min. Pelleted nuclei were extracted with NE buffer (20 mM HEPES pH 7.9, 25% glycerol, 0.25 M NaCl, 0.1% NP-40, 5 mM EDTA, 1 mM PMSF, 5 mM DTT) for 30 min on ice and insoluble materials were removed by centrifugation at 14,000 rpm at 4°C for 20 min. Whole-cell or nuclear lysates (500 µg) were precleared with protein A or recombinant protein G agarose beads (Invitrogen Corp.) for rabbit or mouse antibodies, respectively, for 1 hour, incubated at 4°C with 1-2 µg of antibody for 1-2 hours, and then incubated with protein A or protein G beads for an additional hour. Immunoprecipitates from whole-cell lysates were washed three times with RIPA buffer and once with TBS buffer (50 mM Tris-HCl pH 7.5, 150 mM NaCl). Immunoprecipitates from nuclear extracts were washed once with NE buffer, once with 0.3% Triton X-100, 75 mM NaCl, 15 mM Tris-HCl pH 7.5, and once with 300 mM NaCl, 15 mM Tris-HCl pH 7.5. Immunoprecipitates were resolved by 4%-20% or 4%-12% gradient SDS-PAGE and transferred to PVDF membranes for Western blotting. Antibodies used: rat anti-GATA-1 (N-1) monoclonal, mouse anti-p27 (F-8) monoclonal, rabbit anti-p21 (c-19) polyclonal (all from Santa Cruz Biotechnology Inc., Santa Cruz, CA), rabbit anti-CBP-NT polyclonal (Upstate USA, Inc., Charlottesville, VA), mouse monoclonal anti-CBP (R&D Systems, Minneapolis, MN), and mouse anti-FLAG-M5

monoclonal antibody (Sigma-Aldrich Co., St Louis, MO). Membrane-bound GATA-1 immunoprecipitates were probed with mouse anti-Ac-K-103 Acetylated Lysine monoclonal antibody (Cell Signaling Technology Inc., Danvers, MA) and rat anti-GATA-1 (N-6) monoclonal antibody (Santa Cruz Biotechnology Inc.). Membranes with p27<sup>Kip1</sup> and p21<sup>Waf1/Cip1</sup> immunoprecipitated proteins were probed with mouse anti-p27 (F-8) and anti-p21 (F-5) monoclonal antibodies (Santa Cruz Biotechnology Inc.). To identify GATA-1 and CBP in the CBP-precipitated samples, membranes were probed with rat anti-GATA-1 (N-1) and mouse anti-CBP (C-1) monoclonal antibodies, respectively (Santa Cruz Biotechnology Inc.). TLX1 and  $\alpha$ -tubulin were identified with rabbit anti-TLX1 (HOX11 C-18) polyclonal and mouse anti- $\alpha$ -Tubulin (B-7) monoclonal antibodies (Santa Cruz Biotechnology Inc.) after direct immunoblotting of cell lysates. Where noted, control immunoprecipitations were performed using an irrelevant mouse monoclonal antibody recognizing the *Saccharomyces cerevisiae* GAL4 protein (GAL4 DBD RK5C1) (Santa Cruz Biotechnology Inc.).

The glutathione *S*-transferase (GST)-FLAG-TLX1 (full-length TLX1), GST-FLAG-TLX1 D2 (consisting of amino acids 98-330), GST-FLAG-TLX1 D6 (consisting of amino acids 2-260) and GST-FLAG-TLX1 HD (containing an internal deletion from amino acid 201 to amino acid 260) expression constructs were generated by subcloning PCR-amplified FLAG-tagged TLX1 cDNAs (Owens *et al.*, 2003) into the *EcoRI* site of pGEX-4T-1 (GE Healthcare Bio-Sciences Corp., Piscataway, NJ). GST-FLAG-TLX1 fusion proteins expressed in T7 Express bacteria (New England Biolabs, Inc., Ipswich, MA) were purified by adsorption to glutathione-sepharose 4B beads (GE Healthcare Bio-Sciences Corp.) as described (Heidari *et al.*, 2002). After dialysis against PBS (1:500 ratio twice), 0.5 to 1  $\mu$ g of GST-FLAG-TLX1 and control GST proteins were reapplied to glutathione-sepharose 4B columns and used for pull-down experiments (Berger and Hawley, 1997). Briefly, nuclear lysates (1 mg) from iEBHX1S-4

or 293T cells were incubated with immobilized GST-FLAG-TLX1 and GST proteins for 10 min at 4°C and the columns were washed with 5-10 column volumes of 0.1% Triton X-100, 75 mM NaCl, 15 mM Tris-HCl pH 7.5, then with 0.3% Triton X-100, 75 mM NaCl, 15 mM Tris-HCl pH 7.5, and finally with PBS. Protein complexes were eluted with 2 column volumes of 10 mM glutathione, 50 mM Tris-HCl pH 8.0, and analyzed by Western blotting with mouse monoclonal anti-CBP (R&D Systems) and rabbit anti-GST (Z-5) (Santa Cruz Biotechnology Inc.) antibodies as described above. In pull-down experiments of endogenous CBP in iEBHX1S-4 cells, the eluates were concentrated 10x using Amicon Centricon YM-30 filters (Millipore Corp., Billerica, MA) prior to analysis by Western blotting.

Signal detection and analysis were carried out with alkaline phosphatase-conjugated secondary antibodies (Santa Cruz Biotechnology Inc.) and the ECF Western Blotting Kit (GE Healthcare Bio-Sciences Corp.) on a Storm 860 PhosphorImager equipped with ImageQuant software (GE Healthcare Bio-Sciences Corp.).

#### *Transient transfections*

293T cells were seeded at a density of  $5.0 \times 10^5$  cells/well in six-well plates. Six to twenty-four hours after seeding, the cells were cotransfected with the pRc/RSV-mCBP-HA mouse CBP expression vector (a gift from Dr. Richard Goodman, Oregon Health and Science University, Portland, OR) (Chrivia *et al.*, 1993; Kwok *et al.*, 1994), the pCMV2N3T-CBP human CBP expression vector (a gift from Dr. Annick Harel-Bellan, Institut Andre Lwoff, Villejuif, France) (Ramirez *et al.*, 1997) and/or the pcDNA-FLAG-TLX1 expression vector as described previously (Owens *et al.*, 2003; Riz and Hawley, 2005).

### *Confocal laser scanning microscopy and image analysis*

iEBHX1S-4 cells ( $2.5 \times 10^5$ ) cultured in the presence or absence of 1  $\mu\text{g/ml}$  doxycycline were centrifuged onto a microscope slide at 1000 rpm for 5 minutes using a Shandon Cytospin 4 instrument. The cells were then immediately fixed in 3.7% formaldehyde for 5 minutes at room temperature, rinsed with PBS, and permeabilized with 0.5% Triton X-100 in PBS for 15 minutes at room temperature. Following permeabilization, the cells were rinsed with PBS and blocked in PBS containing 10% FBS and 0.1% Triton X-100 for 1 hour at room temperature. The cells were then incubated with rabbit polyclonal anti-TLX1 (HOX11 C-18) (Santa Cruz Biotechnology Inc.) and mouse monoclonal anti-CBP (R&D Systems) antibodies diluted to final concentrations of 0.4  $\mu\text{g/ml}$  and 1.0  $\mu\text{g/ml}$ , respectively, in PBS containing 1% FBS and 0.01% Triton X-100 for 1 hour at room temperature. The other antibodies used for staining and the concentration they were used at are as follows: rabbit anti-dimethyl-histone H3 (Lys9) diluted 1:250, rabbit anti-trimethyl-histone H3 (Lys9) diluted 1:250, mouse anti-HP1 $\alpha$  at a final concentration of 2.3  $\mu\text{g/ml}$ , and rabbit anti-CBP-NT diluted 1:500 (all from Upstate USA, Inc.). All antibodies were diluted in 1% FBS and 0.01% Triton X-100. The cells were rinsed with PBS and then incubated with Alexa Fluor 568-conjugated goat anti-rabbit and Alexa Fluor 488-conjugated goat anti-mouse secondary antibodies (Invitrogen Corp.) diluted 1:500 in PBS containing 1% FBS and 0.01% Triton X-100 for 1 hour at room temperature. The cells were rinsed with PBS and mounted with Fluoromount G (Electron Microscopy Science, Hatfield PA). 293T cells cultured in six-well plates containing fibronectin-coated coverslips (BD Biosciences) (Owens *et al.*, 2003) were transiently transfected with pcDNA-FLAG-TLX1, pRc/RSV-mCBP-HA or both expression vectors as described above. The total amount of DNA in each transfection was kept constant by the addition of an appropriate amount of the pcDNA3 plasmid. After 36 hours, the cells were processed as above for iEBHX1S-4 cells, except that the rabbit polyclonal anti-TLX1 antibody



was diluted to a final concentration of 0.133  $\mu\text{g/ml}$  and the secondary antibodies were diluted to a final concentration of 1:1000. The slides were mounted with Prolong Antifade mounting medium (Invitrogen Corp.). The slides were sealed and images were acquired using the 60 $\times$  oil immersion objective of a Bio-Rad MRC-1024 confocal laser scanning microscope equipped with an argon-krypton ion laser and LaserSharp 2000 software (Carl Zeiss MicroImaging, Inc., Thornwood, NY).

Confocal images were analyzed using Image-Pro Plus (Media Cybernetics, Silver Spring, MD). Quantification of TLX1 and CBP nuclear distribution in transfected 293T cells was obtained by drawing a line scan extending through the longest axis of the nucleus in the central slice of the image stack. The intensity of the pixels along the line was recorded and used to generate a histogram of signal intensity across the nucleus (Popratiloff *et al.*, 2003). Images were collected under identical conditions and signal intensity maps of the portions of the line scans outside the nuclei were compared to confirm that the level of background staining was consistent among images. Based on the number of pixels, the nucleus was divided into five sections of equal length. The average signal intensity of each section was calculated ( $n = 5$  images per experimental group) and the unpaired Student's *t*-test was used to determine if there was a statistically significant difference between the TLX1 and/or CBP signal intensities in the peripheral sections versus the central sections of the nuclei (Ragoczy *et al.*, 2006).

## **Acknowledgements**

We gratefully acknowledge John McKeague and Joseph Molete for assistance in generating the doxycycline-inducible iTLX1 ESC line, Sara Karandish and Ali Ramezani for helping construct the plasmid encoding the full-length GST-TLX1 fusion protein, and Anastas Popratiloff for advice on confocal image analysis. This work was supported in part by National Institutes of Health grants R01HL65519, R01HL66305 and R24RR16209, by the King Fahd Endowment Fund (The George Washington University School of Medicine and Health Sciences), and by the Intramural Research Program of the National Center for Biotechnology Information (National Library of Medicine, National Institutes of Health).

## References

- Akimov SS, Ramezani A, Hawley TS, Hawley RG (2005). Bypass of senescence, immortalization, and transformation of human hematopoietic progenitor cells. *Stem Cells* **23**: 1423-1433.
- Asano H, Li XS, Stamatoyannopoulos G (1999). FKLf, a novel Kruppel-like factor that activates human embryonic and fetal  $\beta$ -like globin genes. *Mol Cell Biol* **19**: 3571-3579.
- Ashburner M, Ball CA, Blake JA, Botstein D, Butler H, Cherry JM *et al* (2000). Gene ontology: tool for the unification of biology. The Gene Ontology Consortium. *Nat Genet* **25**: 25-29.
- Barnhart KM, Kim CG, Banerji SS, Sheffery M (1988). Identification and characterization of multiple erythroid cell proteins that interact with the promoter of the murine  $\alpha$ -globin gene. *Mol Cell Biol* **8**: 3215-3226.
- Barnhart KM, Kim CG, Sheffery M (1989). Purification and characterization of an erythroid cell-specific factor that binds the murine  $\alpha$ - and  $\beta$ -globin genes. *Mol Cell Biol* **9**: 2606-2614.
- Basu P, Morris PE, Haar JL, Wani MA, Lingrel JB, Gaensler KM *et al* (2005). KLF2 is essential for primitive erythropoiesis and regulates the human and murine embryonic  $\beta$ -like globin genes *in vivo*. *Blood* **106**: 2566-2571.
- Berger LC, Hawley RG (1997). Interferon- $\beta$  interrupts interleukin-6-dependent signaling events in myeloma cells. *Blood* **89**: 261-271.
- Bieker JJ (2001). Kruppel-like factors: three fingers in many pies. *J Biol Chem* **276**: 34355-34358.
- Blobel GA, Nakajima T, Eckner R, Montminy M, Orkin SH (1998). CREB-binding protein cooperates with transcription factor GATA-1 and is required for erythroid differentiation. *Proc Natl Acad Sci USA* **95**: 2061-2066.
- Boyes J, Byfield P, Nakatani Y, Ogryzko V (1998). Regulation of activity of the transcription factor GATA-1 by acetylation. *Nature* **396**: 594-598.
- Cantor AB, Orkin SH (2002). Transcriptional regulation of erythropoiesis: an affair involving multiple partners. *Oncogene* **21**: 3368-3376.
- Chrivia JC, Kwok RP, Lamb N, Hagiwara M, Montminy MR, Goodman RH (1993). Phosphorylated CREB binds specifically to the nuclear protein CBP. *Nature* **365**: 855-859.
- Coghill E, Eccleston S, Fox V, Cerruti L, Brown C, Cunningham J *et al* (2001). Erythroid Kruppel-like factor (EKLF) coordinates erythroid cell proliferation and hemoglobinization in cell lines derived from EKLF null mice. *Blood* **97**: 1861-1868.
- Cohen RB, Sheffery M, Kim CG (1986). Partial purification of a nuclear protein that binds to the CCAAT box of the mouse  $\alpha 1$ -globin gene. *Mol Cell Biol* **6**: 821-832.

- Drissen R, von Lindern M, Kolbus A, Driegen S, Steinlein P, Beug H *et al* (2005). The erythroid phenotype of EKLF-null mice: defects in hemoglobin metabolism and membrane stability. *Mol Cell Biol* **25**: 5205-5214.
- Du Y, Jenkins NA, Copeland NG (2005). Insertional mutagenesis identifies genes that promote the immortalization of primary bone marrow progenitor cells. *Blood* **106**: 3932-3939.
- Duan Z, Stamatoyannopoulos G, Li Q (2001). Role of NF-Y in *in vivo* regulation of the  $\gamma$ -globin gene. *Mol Cell Biol* **21**: 3083-3095.
- Faniello MC, Bevilacqua MA, Condorelli G, de Crombrughe B, Maity SN, Avvedimento VE *et al* (1999). The B subunit of the CAAT-binding factor NFY binds the central segment of the Co-activator p300. *J Biol Chem* **274**: 7623-7626.
- Ferkowicz MJ, Starr M, Xie X, Li W, Johnson SA, Shelley WC *et al* (2003). CD41 expression defines the onset of primitive and definitive hematopoiesis in the murine embryo. *Development* **130**: 4393-4403.
- Frith MC, Fu Y, Yu L, Chen JF, Hansen U, Weng Z (2004). Detection of functional DNA motifs via statistical over-representation. *Nucleic Acids Res* **32**: 1372-1381.
- Garcon L, Lacout C, Svinartchouk F, Le Couedic JP, Villeval JL, Vainchenker W *et al* (2005). Gfi-1B plays a critical role in terminal differentiation of normal and transformed erythroid progenitor cells. *Blood* **105**: 1448-1455.
- Hawley RG, Hawley TS, Fong AZC, Quinto C, Collins M, Leonard JP *et al* (1996). Thrombopoietic potential and serial repopulating ability of murine hematopoietic stem cells constitutively expressing interleukin-11. *Proc Natl Acad Sci USA* **93**: 10297-10302.
- Heidari M, Rice KL, Kees UR, Greene WK (2002). Expression and purification of the human homeodomain oncoprotein HOX11. *Protein Expr Purif* **25**: 313-318.
- Hsieh FF, Barnett LA, Green WF, Freedman K, Matushansky I, Skoultchi AI *et al* (2000). Cell cycle exit during terminal erythroid differentiation is associated with accumulation of p27(Kip1) and inactivation of cdk2 kinase. *Blood* **96**: 2746-2754.
- Huang S, Qiu Y, Stein RW, Brandt SJ (1999). p300 functions as a transcriptional coactivator for the TAL1/SCL oncoprotein. *Oncogene* **18**: 4958-4967.
- Hung HL, Lau J, Kim AY, Weiss MJ, Blobel GA (1999). CREB-binding protein acetylates hematopoietic transcription factor GATA-1 at functionally important sites. *Mol Cell Biol* **19**: 3496-3505.
- Iscoe NN, Guilbert LJ, Weyman C (1980). Complete replacement of serum in primary cultures of erythropoietin-dependent red cell precursors (CFU-E) by albumin, transferrin, iron, unsaturated fatty acid, lecithin and cholesterol. *Exp Cell Res* **126**: 121-126.

- Kapur R, Zhang L (2001). A novel mechanism of cooperation between c-Kit and erythropoietin receptor. Stem cell factor induces the expression of Stat5 and erythropoietin receptor, resulting in efficient proliferation and survival by erythropoietin. *J Biol Chem* **276**: 1099-1106.
- Keller G, Kennedy M, Papayannopoulou T, Wiles M (1993). Hematopoietic commitment during embryonic stem cell differentiation in culture. *Mol Cell Biol* **13**: 473-486.
- Keller G, Wall C, Fong AZC, Hawley TS, Hawley RG (1998). Overexpression of HOX11 leads to the immortalization of embryonic precursors with both primitive and definitive hematopoietic potential. *Blood* **92**: 877-887.
- Kina T, Ikuta K, Takayama E, Wada K, Majumdar AS, Weissman IL *et al* (2000). The monoclonal antibody TER-119 recognizes a molecule associated with glycophorin A and specifically marks the late stages of murine erythroid lineage. *Br J Haematol* **109**: 280-287.
- Koury MJ, Sawyer ST, Brandt SJ (2002). New insights into erythropoiesis. *Curr Opin Hematol* **9**: 93-100.
- Kovacs KA, Steinmann M, Magistretti PJ, Halfon O, Cardinaux JR (2003). CCAAT/enhancer-binding protein family members recruit the coactivator CREB-binding protein and trigger its phosphorylation. *J Biol Chem* **278**: 36959-36965.
- Krasnoselskaya-Riz I, Spruill A, Chen YW, Schuster D, Teslovich T, Baker C *et al* (2002). Nuclear factor 90 mediates activation of the cellular antiviral expression cascade. *AIDS Res Hum Retroviruses* **18**: 591-604.
- Kurtz A, Jelkmann W, Bauer C (1983). Insulin stimulates erythroid colony formation independently of erythropoietin. *Br J Haematol* **53**: 311-316.
- Kwok RP, Lundblad JR, Chrivia JC, Richards JP, Bachinger HP, Brennan RG *et al* (1994). Nuclear protein CBP is a coactivator for the transcription factor CREB. *Nature* **370**: 223-226.
- Kyba M, Perlingeiro RCR, Daley GQ (2002). HoxB4 confers definitive lymphoid-myeloid engraftment potential on embryonic stem cell and yolk sac hematopoietic precursors. *Cell* **109**: 29-37.
- Lahlil R, Lecuyer E, Herblot S, Hoang T (2004). SCL assembles a multifactorial complex that determines glycophorin A expression. *Mol Cell Biol* **24**: 1439-1452.
- Mariño-Ramírez L, Spouge JL, Kanga GC, Landsman D (2004). Statistical analysis of over-represented words in human promoter sequences. *Nucleic Acids Res* **32**: 949-958.
- Matys V, Fricke E, Geffers R, Gossling E, Haubrock M, Hehl R *et al* (2003). TRANSFAC: transcriptional regulation, from patterns to profiles. *Nucleic Acids Res* **31**: 374-378.
- Merika M, Orkin SH (1995). Functional synergy and physical interactions of the erythroid transcription factor GATA-1 with the Kruppel family proteins Sp1 and EKLF. *Mol Cell Biol* **15**: 2437-2447.

- Miller IJ, Bieker JJ (1993). A novel, erythroid cell-specific murine transcription factor that binds to the CACCC element and is related to the Kruppel family of nuclear proteins. *Mol Cell Biol* **13**: 2776-2786.
- Mink S, Haenig B, Klempnauer KH (1997). Interaction and functional collaboration of p300 and C/EBP $\beta$ . *Mol Cell Biol* **17**: 6609-6617.
- Owens BM, Zhu YX, Suen TC, Wang PX, Greenblatt JF, Goss PE *et al* (2003). Specific homeodomain-DNA interactions are required for HOX11-mediated transformation. *Blood* **101**: 4966-4974.
- Popratiloff A, Giaume C, Peusner KD (2003). Developmental change in expression and subcellular localization of two shaker-related potassium channel proteins (Kv1.1 and Kv1.2) in the chick tangential vestibular nucleus. *J Comp Neurol* **461**: 466-482.
- Ragoczy T, Bender MA, Telling A, Byron R, Groudine M (2006). The locus control region is required for association of the murine  $\beta$ -globin locus with engaged transcription factories during erythroid maturation. *Genes Dev* **20**: 1447-1457.
- Ramirez S, Ait-Si-Ali S, Robin P, Trouche D, Harel-Bellan A (1997). The CREB-binding protein (CBP) cooperates with the serum response factor for transactivation of the c-fos serum response element. *J Biol Chem* **272**: 31016-31021.
- Riz I, Hawley RG (2005). G<sub>1</sub>/S transcriptional networks modulated by the *HOX11/TLX1* oncogene of T-cell acute lymphoblastic leukemia. *Oncogene* **24**: 5561-5575.
- Rodriguez P, Bonte E, Krijgsveld J, Kolodziej KE, Guyot B, Heck AJ *et al* (2005). GATA-1 forms distinct activating and repressive complexes in erythroid cells. *EMBO J* **24**: 2354-2366.
- Rylski M, Welch JJ, Chen YY, Letting DL, Diehl JA, Chodosh LA *et al* (2003). GATA-1-mediated proliferation arrest during erythroid maturation. *Mol Cell Biol* **23**: 5031-5042.
- Sabath DE, Koehler KM, Yang WQ, Phan V, Wilson J (1998). DNA-protein interactions in the proximal  $\zeta$ -globin promoter: identification of novel CCACCC- and CCAAT-binding proteins. *Blood Cells Mol Dis* **24**: 183-198.
- Saleque S, Cameron S, Orkin SH (2002). The zinc-finger proto-oncogene Gfi-1b is essential for development of the erythroid and megakaryocytic lineages. *Genes Dev* **16**: 301-306.
- Schuh AH, Tipping AJ, Clark AJ, Hamlett I, Guyot B, Iborra FJ *et al* (2005). ETO-2 associates with SCL in erythroid cells and megakaryocytes and provides repressor functions in erythropoiesis. *Mol Cell Biol* **25**: 10235-10250.
- Tewari R, Gillemans N, Wijgerde M, Nuez B, von Lindern M, Grosveld F *et al* (1998). Erythroid Kruppel-like factor (EKLF) is active in primitive and definitive erythroid cells and is required for the function of 5'HS3 of the  $\beta$ -globin locus control region. *EMBO J* **17**: 2334-2341.

- Tharakaraman K, Mariño-Ramírez L, Sheetlin S, Landsman D, Spouge JL (2005). Alignments anchored on genomic landmarks can aid in the identification of regulatory elements. *Bioinformatics* **21** (Suppl. 1): i440-i448.
- Tong B, Grimes HL, Yang TY, Bear SE, Qin Z, Du K *et al* (1998). The Gfi-1B proto-oncoprotein represses p21WAF1 and inhibits myeloid cell differentiation. *Mol Cell Biol* **18**: 2462-2473.
- Wadman IA, Osada H, Grutz GG, Agulnick AD, Westphal H, Forster A *et al* (1997). The LIM-only protein Lmo2 is a bridging molecule assembling an erythroid, DNA-binding complex which includes the TAL1, E47, GATA-1 and Ldb1/NLI proteins. *EMBO J* **16**: 3145-3157.
- Weiss MJ, Yu C, Orkin SH (1997). Erythroid-cell-specific properties of transcription factor GATA-1 revealed by phenotypic rescue of a gene-targeted cell line. *Mol Cell Biol* **17**: 1642-1651.
- Welch JJ, Watts JA, Vakoc CR, Yao Y, Wang H, Hardison RC *et al* (2004). Global regulation of erythroid gene expression by transcription factor GATA-1. *Blood* **104**: 3136-3147.
- Xu Z, Huang S, Chang LS, Agulnick AD, Brandt SJ (2003). Identification of a TAL1 target gene reveals a positive role for the LIM domain-binding protein Ldb1 in erythroid gene expression and differentiation. *Mol Cell Biol* **23**: 7585-7599.
- Yamashita R, Suzuki Y, Wakaguri H, Tsuritani K, Nakai K, Sugano S (2006). DBTSS: database of human transcription start sites; progress report 2006. *Nucleic Acids Res* **34**: D86-D89.
- Zafarana G, Rottier R, Grosveld F, Philipsen S (2000). Erythroid overexpression of C/EBP $\gamma$  in transgenic mice affects  $\gamma$ -globin expression and fetal liver erythropoiesis. *EMBO J* **19**: 5856-5863.
- Zhang W, Bieker JJ (1998). Acetylation and modulation of erythroid Kruppel-like factor (EKLF) activity by interaction with histone acetyltransferases. *Proc Natl Acad Sci USA* **95**: 9855-9860.
- Zhang W, Kadam S, Emerson BM, Bieker JJ (2001). Site-specific acetylation by p300 or CREB binding protein regulates erythroid Kruppel-like factor transcriptional activity via its interaction with the SWI-SNF complex. *Mol Cell Biol* **21**: 2413-2422.
- Zon LI, Youssoufian H, Mather C, Lodish HF, Orkin SH (1991). Activation of the erythropoietin receptor promoter by transcription factor GATA-1. *Proc Natl Acad Sci USA* **88**: 10638-10641.

## Supplementary Table 1

Genes analyzed from the Figure 1c subtrees of induced transcripts based on Gene Ontology (GO) “Transcription” group categorization

| <i>Affymetrix Probe Set ID</i> | <i>Name</i>                                                                    | <i>Gene</i> | <i>Entrez Gene</i>                   |
|--------------------------------|--------------------------------------------------------------------------------|-------------|--------------------------------------|
| 100023_at                      | myeloblastosis oncogene-like 2                                                 | Mybl2       | 17865<br><a href="#">Entrez gene</a> |
| 100050_at                      | inhibitor of DNA binding 1                                                     | Id1         | 15901<br><a href="#">Entrez gene</a> |
| 100062_at                      | minichromosome maintenance deficient 3 (S. cerevisiae)                         | Mcm3        | 17215<br><a href="#">Entrez gene</a> |
| 100148_at                      | CCCTC-binding factor                                                           | Ctcf        | 13018<br><a href="#">Entrez gene</a> |
| 100156_at                      | minichromosome maintenance deficient 5, cell division cycle 46 (S. cerevisiae) | Mcm5        | 17218<br><a href="#">Entrez gene</a> |
| 100405_at                      | chromobox homolog 3 (Drosophila HP1 gamma)                                     | Cbx3        | 12417<br><a href="#">Entrez gene</a> |
| 100441_s_at                    | ankyrin 1, erythroid                                                           | Ank1        | 11733<br><a href="#">Entrez gene</a> |
| 100451_at                      | heat shock factor 1                                                            | Hsf1        | 15499<br><a href="#">Entrez gene</a> |
| 100461_at                      | polymerase (RNA) II (DNA directed) polypeptide J                               | Polr2j      | 20022<br><a href="#">Entrez gene</a> |
| 100553_at                      | tripartite motif protein 27                                                    | Trim27      | 19720<br><a href="#">Entrez gene</a> |
| 100616_at                      | centromere autoantigen A                                                       | Cenpa       | 12615<br><a href="#">Entrez gene</a> |
| 100941_at                      | protein inhibitor of activated STAT 2                                          | Pias2       | 17344<br><a href="#">Entrez gene</a> |
| 100984_at                      | activating transcription factor 1                                              | Atf1        | 11908<br><a href="#">Entrez gene</a> |
| 101382_at                      | pre B-cell leukemia transcription factor 2                                     | Pbx2        | 18515<br><a href="#">Entrez gene</a> |
| 101445_at                      | DNA methyltransferase (cytosine-5) 1                                           | Dnmt1       | 13433<br><a href="#">Entrez gene</a> |
| 101465_at                      | signal transducer and activator of transcription 1                             | Stat1       | 20846<br><a href="#">Entrez gene</a> |
| 101475_at                      | polycomb group ring finger 4                                                   | Pcgf4       | 12151<br><a href="#">Entrez gene</a> |



|             |                                                       |        |                                      |
|-------------|-------------------------------------------------------|--------|--------------------------------------|
| 101589_at   | high mobility group nucleosomal binding domain 2      | Hmgn2  | 15331<br><a href="#">Entrez gene</a> |
| 101920_at   | polymerase (DNA directed), epsilon 2 (p59 subunit)    | Pole2  | 18974<br><a href="#">Entrez gene</a> |
| 101930_at   | nuclear factor I/X                                    | Nfix   | 18032<br><a href="#">Entrez gene</a> |
| 101958_f_at | transcription factor Dp 1                             | Tfdp1  | 21781<br><a href="#">Entrez gene</a> |
| 101959_r_at | transcription factor Dp 1                             | Tfdp1  | 21781<br><a href="#">Entrez gene</a> |
| 102054_at   | ankyrin repeat and FYVE domain containing 1           | Ankfy1 | 11736<br><a href="#">Entrez gene</a> |
| 102242_at   | period homolog 3 (Drosophila)                         | Per3   | 18628<br><a href="#">Entrez gene</a> |
| 102382_at   | aryl hydrocarbon receptor nuclear translocator-like   | Arntl  | 11865<br><a href="#">Entrez gene</a> |
| 102631_at   | Bloom syndrome homolog (human)                        | Blm    | 12144<br><a href="#">Entrez gene</a> |
| 102654_at   | GATA binding protein 1                                | Gata1  | 14460<br><a href="#">Entrez gene</a> |
| 102893_at   | POU domain, class 2, transcription factor 1           | Pou2f1 | 18986<br><a href="#">Entrez gene</a> |
| 102963_at   | E2F transcription factor 1                            | E2f1   | 13555<br><a href="#">Entrez gene</a> |
| 102976_at   | breast cancer 1                                       | Brcal  | 12189<br><a href="#">Entrez gene</a> |
| 103057_at   | polymerase (DNA directed), delta 1, catalytic subunit | Pold1  | 18971<br><a href="#">Entrez gene</a> |
| 103207_at   | polymerase (DNA directed), alpha 1                    | Pola1  | 18968<br><a href="#">Entrez gene</a> |
| 103285_at   | methyl-CpG binding domain protein 4                   | Mbd4   | 17193<br><a href="#">Entrez gene</a> |
| 103546_at   | fos-like antigen 2                                    | Fosl2  | 14284<br><a href="#">Entrez gene</a> |
| 103598_at   | DEAH (Asp-Glu-Ala-His) box polypeptide 9              | Dhx9   | 13211<br><a href="#">Entrez gene</a> |
| 104220_at   | MAD homolog 6 (Drosophila)                            | Smad6  | 17130<br><a href="#">Entrez gene</a> |
| 104476_at   | retinoblastoma-like 1 (p107)                          | Rbl1   | 19650<br><a href="#">Entrez gene</a> |
| 104644_at   | kinesin family member 4                               | Kif4   | 16571                                |

|            |                                                                                                                                                              |                                                                                                          |                                                                                                                                                                                                                                                                                                                                                                              |
|------------|--------------------------------------------------------------------------------------------------------------------------------------------------------------|----------------------------------------------------------------------------------------------------------|------------------------------------------------------------------------------------------------------------------------------------------------------------------------------------------------------------------------------------------------------------------------------------------------------------------------------------------------------------------------------|
|            |                                                                                                                                                              |                                                                                                          | <a href="#">Entrez gene</a>                                                                                                                                                                                                                                                                                                                                                  |
| 92199_at   | signal transducer and activator of transcription 5B                                                                                                          | Stat5b                                                                                                   | 20851<br><a href="#">Entrez gene</a>                                                                                                                                                                                                                                                                                                                                         |
| 92219_s_at | midline 1                                                                                                                                                    | Mid1                                                                                                     | 17318<br><a href="#">Entrez gene</a>                                                                                                                                                                                                                                                                                                                                         |
| 92234_at   | retinoid X receptor alpha                                                                                                                                    | Rxra                                                                                                     | 20181<br><a href="#">Entrez gene</a>                                                                                                                                                                                                                                                                                                                                         |
| 92235_g_at | retinoid X receptor alpha                                                                                                                                    | Rxra                                                                                                     | 20181<br><a href="#">Entrez gene</a>                                                                                                                                                                                                                                                                                                                                         |
| 92244_at   | exonuclease 1                                                                                                                                                | Exo1                                                                                                     | 26909<br><a href="#">Entrez gene</a>                                                                                                                                                                                                                                                                                                                                         |
| 92257_at   | circadian locomoter output cycles kaput                                                                                                                      | Clock                                                                                                    | 12753<br><a href="#">Entrez gene</a>                                                                                                                                                                                                                                                                                                                                         |
| 92468_at   | ankyrin repeat domain 49                                                                                                                                     | Ankrd49                                                                                                  | 56503<br><a href="#">Entrez gene</a>                                                                                                                                                                                                                                                                                                                                         |
| 92882_at   | RAB1, member RAS oncogene family                                                                                                                             | Rab1                                                                                                     | 19324<br><a href="#">Entrez gene</a>                                                                                                                                                                                                                                                                                                                                         |
| 92933_at   | POU domain, class 2, transcription factor 3                                                                                                                  | Pou2f3                                                                                                   | 18988<br><a href="#">Entrez gene</a>                                                                                                                                                                                                                                                                                                                                         |
| 93023_f_at | histone 1, H3g<br>histone 1, H3f<br>histone1, H3c<br>histone1, H3d<br>histone 1, H3b<br>histone 1, H3e<br>histone 1, H3h<br>histone 1, H3i<br>histone 1, H3a | Hist1h3g<br>Hist1h3f<br>Hist1h3c<br>Hist1h3d<br>Hist1h3b<br>Hist1h3e<br>Hist1h3h<br>Hist1h3i<br>Hist1h3a | 260423<br><a href="#">Entrez gene</a><br>319148<br><a href="#">Entrez gene</a><br>319149<br><a href="#">Entrez gene</a><br>319150<br><a href="#">Entrez gene</a><br>319151<br><a href="#">Entrez gene</a><br>319152<br><a href="#">Entrez gene</a><br>319153<br><a href="#">Entrez gene</a><br>360198<br><a href="#">Entrez gene</a><br>97908<br><a href="#">Entrez gene</a> |
| 93041_at   | minichromosome maintenance deficient 4 homolog (S. cerevisiae)                                                                                               | Mcm4                                                                                                     | 17217<br><a href="#">Entrez gene</a>                                                                                                                                                                                                                                                                                                                                         |
| 93095_at   | high mobility group box 1                                                                                                                                    | Hmgb1                                                                                                    | 15289<br><a href="#">Entrez gene</a>                                                                                                                                                                                                                                                                                                                                         |
| 93112_at   | minichromosome maintenance deficient 2 mitotin (S. cerevisiae)                                                                                               | Mcm2                                                                                                     | 17216<br><a href="#">Entrez gene</a>                                                                                                                                                                                                                                                                                                                                         |

|            |                                                                                                                                                                                                               |                                                           |                                                                                                                                                                                                          |
|------------|---------------------------------------------------------------------------------------------------------------------------------------------------------------------------------------------------------------|-----------------------------------------------------------|----------------------------------------------------------------------------------------------------------------------------------------------------------------------------------------------------------|
| 93250_r_at | high mobility group box 2<br>similar to high mobility group protein B2<br>similar to high mobility group protein B2<br>similar to high mobility group protein B2<br>similar to high mobility group protein B2 | Hmgb2<br>LOC433785<br>LOC433788<br>LOC433799<br>LOC545710 | 433785<br><a href="#">Entrez gene</a><br>433788<br><a href="#">Entrez gene</a><br>433799<br><a href="#">Entrez gene</a><br>545710<br><a href="#">Entrez gene</a><br>97165<br><a href="#">Entrez gene</a> |
| 93356_at   | minichromosome maintenance deficient 7 (S. cerevisiae)                                                                                                                                                        | Mcm7                                                      | 17220<br><a href="#">Entrez gene</a>                                                                                                                                                                     |
| 93406_at   | v-maf musculoaponeurotic fibrosarcoma oncogene family, protein G (avian)                                                                                                                                      | Mafg                                                      | 17134<br><a href="#">Entrez gene</a>                                                                                                                                                                     |
| 93413_at   | telomeric repeat binding factor 2                                                                                                                                                                             | Terf2                                                     | 21750<br><a href="#">Entrez gene</a>                                                                                                                                                                     |
| 93699_at   | polymerase (DNA directed), gamma 2, accessory subunit                                                                                                                                                         | Polg2                                                     | 50776<br><a href="#">Entrez gene</a>                                                                                                                                                                     |
| 93708_at   | protein inhibitor of activated STAT 3                                                                                                                                                                         | Pias3                                                     | 229615<br><a href="#">Entrez gene</a>                                                                                                                                                                    |
| 94031_at   | RAB2, member RAS oncogene family                                                                                                                                                                              | Rab2                                                      | 59021<br><a href="#">Entrez gene</a>                                                                                                                                                                     |
| 94467_at   | CCAAT/enhancer binding protein zeta                                                                                                                                                                           | Cebpz                                                     | 12607<br><a href="#">Entrez gene</a>                                                                                                                                                                     |
| 94521_at   | cyclin-dependent kinase inhibitor 2D (p19, inhibits CDK4)                                                                                                                                                     | Cdkn2d                                                    | 12581<br><a href="#">Entrez gene</a>                                                                                                                                                                     |
| 94709_at   | glial cells missing homolog 2 (Drosophila)                                                                                                                                                                    | Gcm2                                                      | 107889<br><a href="#">Entrez gene</a>                                                                                                                                                                    |
| 94969_at   | nuclear transcription factor-Y gamma                                                                                                                                                                          | Nfyc                                                      | 18046<br><a href="#">Entrez gene</a>                                                                                                                                                                     |
| 95479_at   | nuclear DNA binding protein                                                                                                                                                                                   | MGI:1927354                                               | 57316<br><a href="#">Entrez gene</a>                                                                                                                                                                     |
| 95755_at   | cold shock domain protein A                                                                                                                                                                                   | Csda                                                      | 56449<br><a href="#">Entrez gene</a>                                                                                                                                                                     |
| 95795_at   | suppressor of Ty 4 homolog 2 (S. cerevisiae)                                                                                                                                                                  | Supt4h2                                                   | 20923<br><a href="#">Entrez gene</a>                                                                                                                                                                     |
| 96084_at   | heterogeneous nuclear ribonucleoprotein D-like                                                                                                                                                                | Hnrpdl                                                    | 50926<br><a href="#">Entrez gene</a>                                                                                                                                                                     |
| 96192_at   | trans-acting transcription factor 3                                                                                                                                                                           | Sp3                                                       | 20687<br><a href="#">Entrez gene</a>                                                                                                                                                                     |
| 96651_at   | SWI/SNF related, matrix associated, actin dependent regulator of chromatin, subfamily e, member 1                                                                                                             | Smarca1                                                   | 57376<br><a href="#">Entrez gene</a>                                                                                                                                                                     |

|          |                                                           |        |                                      |
|----------|-----------------------------------------------------------|--------|--------------------------------------|
| 97327_at | flap structure specific endonuclease 1                    | Fen1   | 14156<br><a href="#">Entrez gene</a> |
| 97789_at | forkhead box H1                                           | Foxh1  | 14106<br><a href="#">Entrez gene</a> |
| 97965_at | phospholipase A2, group VI                                | Pla2g6 | 53357<br><a href="#">Entrez gene</a> |
| 98024_at | nuclear transcription factor-Y beta                       | Nfyb   | 18045<br><a href="#">Entrez gene</a> |
| 98032_at | zinc finger protein 35                                    | Zfp35  | 22694<br><a href="#">Entrez gene</a> |
| 98289_at | E74-like factor 4 (ets domain transcription factor)       | Elf4   | 56501<br><a href="#">Entrez gene</a> |
| 98469_at | aurora kinase B                                           | Aurkb  | 20877<br><a href="#">Entrez gene</a> |
| 98770_at | centromere autoantigen C1                                 | Cenpc1 | 12617<br><a href="#">Entrez gene</a> |
| 99095_at | Max protein                                               | Max    | 17187<br><a href="#">Entrez gene</a> |
| 99486_at | centromere autoantigen B                                  | Cenpb  | 12616<br><a href="#">Entrez gene</a> |
| 99558_at | cyclin C                                                  | Ccnc   | 51813<br><a href="#">Entrez gene</a> |
| 99564_at | ubiquitin-like, containing PHD and RING finger domains, 1 | Uhrf1  | 18140<br><a href="#">Entrez gene</a> |
| 99578_at | topoisomerase (DNA) II alpha                              | Top2a  | 21973<br><a href="#">Entrez gene</a> |
| 99587_at | RAB7, member RAS oncogene family                          | Rab7   | 19349<br><a href="#">Entrez gene</a> |
| 99908_at | paired box gene 4                                         | Pax4   | 18506<br><a href="#">Entrez gene</a> |
| 99917_at | enhancer of zeste homolog 2 (Drosophila)                  | Ezh2   | 14056<br><a href="#">Entrez gene</a> |
| 99932_at | zinc finger and BTB domain containing 17                  | Zbtb17 | 22642<br><a href="#">Entrez gene</a> |

## Supplementary Table 2

Genes analyzed from the Figure 1c set of Ccne1-like profile neighbors of induced transcripts based on GO “Transcription” group categorization

| <i>Affymetrix Probe Set ID</i> | <i>Name</i>                                      | <i>Gene</i> | <i>Entrez Gene</i>                   |
|--------------------------------|--------------------------------------------------|-------------|--------------------------------------|
| 100050_at                      | inhibitor of DNA binding 1                       | Id1         | 15901<br><a href="#">Entrez gene</a> |
| 100452_at                      | Kruppel-like factor 1 (erythroid)                | Klf1        | 16596<br><a href="#">Entrez gene</a> |
| 100461_at                      | polymerase (RNA) II (DNA directed) polypeptide J | Polr2j      | 20022<br><a href="#">Entrez gene</a> |
| 100616_at                      | centromere autoantigen A                         | Cenpa       | 12615<br><a href="#">Entrez gene</a> |
| 100941_at                      | protein inhibitor of activated STAT 2            | Pias2       | 17344<br><a href="#">Entrez gene</a> |
| 100984_at                      | activating transcription factor 1                | Atf1        | 11908<br><a href="#">Entrez gene</a> |
| 101382_at                      | pre B-cell leukemia transcription factor 2       | Pbx2        | 18515<br><a href="#">Entrez gene</a> |
| 101475_at                      | polycomb group ring finger 4                     | Pcgf4       | 12151<br><a href="#">Entrez gene</a> |
| 101589_at                      | high mobility group nucleosomal binding domain 2 | Hmgn2       | 15331<br><a href="#">Entrez gene</a> |
| 101888_at                      | RAR-related orphan receptor alpha                | Rora        | 19883<br><a href="#">Entrez gene</a> |
| 101930_at                      | nuclear factor I/X                               | Nfix        | 18032<br><a href="#">Entrez gene</a> |
| 101958_f_at                    | transcription factor Dp 1                        | Tfdp1       | 21781<br><a href="#">Entrez gene</a> |
| 101959_r_at                    | transcription factor Dp 1                        | Tfdp1       | 21781<br><a href="#">Entrez gene</a> |
| 102242_at                      | period homolog 3 (Drosophila)                    | Per3        | 18628<br><a href="#">Entrez gene</a> |
| 102654_at                      | GATA binding protein 1                           | Gata1       | 14460<br><a href="#">Entrez gene</a> |
| 102819_at                      | nucleosome assembly protein 1-like 2             | Nap112      | 17954<br><a href="#">Entrez gene</a> |
| 102963_at                      | E2F transcription factor 1                       | E2f1        | 13555<br><a href="#">Entrez gene</a> |

|            |                                                                                                                                                                                                               |                                                           |                                                                                                                                                                                                                                                   |
|------------|---------------------------------------------------------------------------------------------------------------------------------------------------------------------------------------------------------------|-----------------------------------------------------------|---------------------------------------------------------------------------------------------------------------------------------------------------------------------------------------------------------------------------------------------------|
| 103285_at  | methyl-CpG binding domain protein 4                                                                                                                                                                           | Mbd4                                                      | 17193<br><a href="#">Entrez gene</a>                                                                                                                                                                                                              |
| 103546_at  | fos-like antigen 2                                                                                                                                                                                            | Fosl2                                                     | 14284<br><a href="#">Entrez gene</a>                                                                                                                                                                                                              |
| 103598_at  | DEAH (Asp-Glu-Ala-His) box polypeptide 9                                                                                                                                                                      | Dhx9                                                      | 13211<br><a href="#">Entrez gene</a>                                                                                                                                                                                                              |
| 104220_at  | MAD homolog 6 (Drosophila)                                                                                                                                                                                    | Smad6                                                     | 17130<br><a href="#">Entrez gene</a>                                                                                                                                                                                                              |
| 92235_g_at | retinoid X receptor alpha                                                                                                                                                                                     | Rxra                                                      | 20181<br><a href="#">Entrez gene</a>                                                                                                                                                                                                              |
| 92244_at   | exonuclease 1                                                                                                                                                                                                 | Exo1                                                      | 26909<br><a href="#">Entrez gene</a>                                                                                                                                                                                                              |
| 92468_at   | ankyrin repeat domain 49                                                                                                                                                                                      | Ankrd49                                                   | 56503<br><a href="#">Entrez gene</a>                                                                                                                                                                                                              |
| 93089_at   | eukaryotic translation initiation factor 4A2                                                                                                                                                                  | Eif4a2                                                    | 13682<br><a href="#">Entrez gene</a>                                                                                                                                                                                                              |
| 93129_at   | cut-like 2 (Drosophila)                                                                                                                                                                                       | Cutl2                                                     | 13048<br><a href="#">Entrez gene</a>                                                                                                                                                                                                              |
| 93250_r_at | high mobility group box 2<br>similar to high mobility group protein B2<br>similar to high mobility group protein B2<br>similar to high mobility group protein B2<br>similar to high mobility group protein B2 | Hmgb2<br>LOC433785<br>LOC433788<br>LOC433799<br>LOC545710 | 433785<br><a href="#">Entrez gene</a><br>433788<br><a href="#">Entrez gene</a><br>433799<br><a href="#">Entrez gene</a><br>433799<br><a href="#">Entrez gene</a><br>545710<br><a href="#">Entrez gene</a><br>97165<br><a href="#">Entrez gene</a> |
| 93708_at   | protein inhibitor of activated STAT 3                                                                                                                                                                         | Pias3                                                     | 229615<br><a href="#">Entrez gene</a>                                                                                                                                                                                                             |
| 94031_at   | RAB2, member RAS oncogene family                                                                                                                                                                              | Rab2                                                      | 59021<br><a href="#">Entrez gene</a>                                                                                                                                                                                                              |
| 94521_at   | cyclin-dependent kinase inhibitor 2D (p19, inhibits CDK4)                                                                                                                                                     | Cdkn2d                                                    | 12581<br><a href="#">Entrez gene</a>                                                                                                                                                                                                              |
| 95791_s_at | splicing factor, arginine/serine-rich 2 (SC-35)                                                                                                                                                               | Sfrs2                                                     | 20382<br><a href="#">Entrez gene</a>                                                                                                                                                                                                              |
| 95795_at   | suppressor of Ty 4 homolog 2 (S. cerevisiae)                                                                                                                                                                  | Supt4h2                                                   | 20923<br><a href="#">Entrez gene</a>                                                                                                                                                                                                              |
| 96050_at   | SWI/SNF related, matrix associated, actin dependent regulator of chromatin, subfamily b, member 1                                                                                                             | Smarcb1                                                   | 20587<br><a href="#">Entrez gene</a>                                                                                                                                                                                                              |
| 96084_at   | heterogeneous nuclear ribonucleoprotein D-like                                                                                                                                                                | Hnrpdl                                                    | 50926<br><a href="#">Entrez gene</a>                                                                                                                                                                                                              |

|            |                                          |        |                                      |
|------------|------------------------------------------|--------|--------------------------------------|
| 96192_at   | trans-acting transcription factor 3      | Sp3    | 20687<br><a href="#">Entrez gene</a> |
| 97327_at   | flap structure specific endonuclease 1   | Fen1   | 14156<br><a href="#">Entrez gene</a> |
| 97789_at   | forkhead box H1                          | Foxh1  | 14106<br><a href="#">Entrez gene</a> |
| 97965_at   | phospholipase A2, group VI               | Pla2g6 | 53357<br><a href="#">Entrez gene</a> |
| 98002_at   | interferon regulatory factor 8           | Irf8   | 15900<br><a href="#">Entrez gene</a> |
| 98032_at   | zinc finger protein 35                   | Zfp35  | 22694<br><a href="#">Entrez gene</a> |
| 98038_at   | high mobility group box 3                | Hmgb3  | 15354<br><a href="#">Entrez gene</a> |
| 98469_at   | aurora kinase B                          | Aurkb  | 20877<br><a href="#">Entrez gene</a> |
| 98981_s_at | transcription factor 12                  | Tcf12  | 21406<br><a href="#">Entrez gene</a> |
| 99486_at   | centromere autoantigen B                 | Cenpb  | 12616<br><a href="#">Entrez gene</a> |
| 99587_at   | RAB7, member RAS oncogene family         | Rab7   | 19349<br><a href="#">Entrez gene</a> |
| 99932_at   | zinc finger and BTB domain containing 17 | Zbtb17 | 22642<br><a href="#">Entrez gene</a> |

### Supplementary Table 3

Genes analyzed from the Figure 1c set of Hba-x-like profile neighbors of induced transcripts based on GO “Transcription” group categorization

| <i>Affymetrix Probe Set ID</i> | <i>Name</i>                                                                                       | <i>Gene</i> | <i>Entrez Gene</i>                 |
|--------------------------------|---------------------------------------------------------------------------------------------------|-------------|------------------------------------|
| 100156_at                      | minichromosome maintenance deficient 5, cell division cycle 46 ( <i>S. cerevisiae</i> )           | Mcm5        | 17218 <a href="#">Entrez gene</a>  |
| 100405_at                      | chromobox homolog 3 ( <i>Drosophila</i> HP1 gamma)                                                | Cbx3        | 12417 <a href="#">Entrez gene</a>  |
| 100701_r_at                    | nuclear receptor subfamily 5, group A, member 1                                                   | Nr5a1       | 26423 <a href="#">Entrez gene</a>  |
| 101305_at                      | POU domain, class 3, transcription factor 3                                                       | Pou3f3      | 18993 <a href="#">Entrez gene</a>  |
| 101310_at                      | T-cell acute lymphocytic leukemia 2                                                               | Tal2        | 21350 <a href="#">Entrez gene</a>  |
| 102614_at                      | prospero-related homeobox 1                                                                       | Prox1       | 19130 <a href="#">Entrez gene</a>  |
| 102715_at                      | nuclear receptor subfamily 2, group F, member 1                                                   | Nr2f1       | 13865 <a href="#">Entrez gene</a>  |
| 102882_at                      | zinc finger protein 46                                                                            | Zfp46       | 22704 <a href="#">Entrez gene</a>  |
| 103204_r_at                    | E2F transcription factor 8                                                                        | E2f8        | 108961 <a href="#">Entrez gene</a> |
| 103990_at                      | FBJ osteosarcoma oncogene B                                                                       | Fosb        | 14282 <a href="#">Entrez gene</a>  |
| 104292_at                      | eyes absent 2 homolog ( <i>Drosophila</i> )                                                       | Eya2        | 14049 <a href="#">Entrez gene</a>  |
| 104408_s_at                    | SRY-box containing gene 18                                                                        | Sox18       | 20672 <a href="#">Entrez gene</a>  |
| 160109_at                      | SRY-box containing gene 4                                                                         | Sox4        | 20677 <a href="#">Entrez gene</a>  |
| 161279_f_at                    | Ring finger protein 12, mRNA (cDNA clone MGC:13712 IMAGE:4193003)                                 | Rnf12       | 19820 <a href="#">Entrez gene</a>  |
| 161340_r_at                    | paired-like homeodomain transcription factor 2                                                    | Pitx2       | 18741 <a href="#">Entrez gene</a>  |
| 161858_f_at                    | retinoblastoma 1                                                                                  | Rb1         | 19645 <a href="#">Entrez gene</a>  |
| 161965_r_at                    | SWI/SNF related, matrix associated, actin dependent regulator of chromatin, subfamily d, member 2 | Smarcd2     | 83796 <a href="#">Entrez gene</a>  |



|            |                                                                  |         |                                    |
|------------|------------------------------------------------------------------|---------|------------------------------------|
| 92249_g_at | nuclear receptor subfamily 4, group A, member 2                  | Nr4a2   | 18227 <a href="#">Entrez gene</a>  |
| 92275_at   | transcription factor AP-2, gamma                                 | Tcfap2c | 21420 <a href="#">Entrez gene</a>  |
| 92299_at   | jumonji, AT rich interactive domain 1A (Rbp2 like)               | Jarid1a | 214899 <a href="#">Entrez gene</a> |
| 92342_at   | SRY-box containing gene 1                                        | Sox1    | 20664 <a href="#">Entrez gene</a>  |
| 92705_at   | T-box 2                                                          | Tbx2    | 21385 <a href="#">Entrez gene</a>  |
| 92781_at   | thymopoietin                                                     | Tmpo    | 21917 <a href="#">Entrez gene</a>  |
| 92926_at   | myeloproliferative leukemia virus oncogene                       | Mpl     | 17480 <a href="#">Entrez gene</a>  |
| 92933_at   | POU domain, class 2, transcription factor 3                      | Pou2f3  | 18988 <a href="#">Entrez gene</a>  |
| 93041_at   | minichromosome maintenance deficient 4 homolog (S. cerevisiae)   | Mcm4    | 17217 <a href="#">Entrez gene</a>  |
| 93095_at   | high mobility group box 1                                        | Hmgb1   | 15289 <a href="#">Entrez gene</a>  |
| 93356_at   | minichromosome maintenance deficient 7 (S. cerevisiae)           | Mcm7    | 17220 <a href="#">Entrez gene</a>  |
| 93468_at   | AF4/FMR2 family, member 1                                        | Aff1    | 17355 <a href="#">Entrez gene</a>  |
| 94128_at   | BRCA1 associated RING domain 1                                   | Bard1   | 12021 <a href="#">Entrez gene</a>  |
| 94212_at   | TSC22 domain family 3                                            | Tsc22d3 | 14605 <a href="#">Entrez gene</a>  |
| 94467_at   | CCAAT/enhancer binding protein zeta                              | Cebpz   | 12607 <a href="#">Entrez gene</a>  |
| 94709_at   | glial cells missing homolog 2 (Drosophila)                       | Gcm2    | 107889 <a href="#">Entrez gene</a> |
| 95673_s_at | Brain abundant, membrane attached signal protein 1 (Basp1), mRNA | Basp1   | 70350 <a href="#">Entrez gene</a>  |
| 96500_at   | GATA binding protein 5                                           | Gata5   | 14464 <a href="#">Entrez gene</a>  |
| 97555_at   | chromobox homolog 7                                              | Cbx7    | 52609 <a href="#">Entrez gene</a>  |
| 97777_at   | NK2 transcription factor related, locus 5 (Drosophila)           | Nkx2-5  | 18091 <a href="#">Entrez gene</a>  |
| 97996_at   | poly (A) polymerase alpha                                        | Papola  | 18789 <a href="#">Entrez gene</a>  |

|          |                                                     |        |                                   |
|----------|-----------------------------------------------------|--------|-----------------------------------|
|          |                                                     |        | <a href="#">gene</a>              |
| 98073_at | cut-like 1 (Drosophila)                             | Cutl1  | 13047 <a href="#">Entrez gene</a> |
| 98839_at | sine oculis-related homeobox 2 homolog (Drosophila) | Six2   | 20472 <a href="#">Entrez gene</a> |
| 99385_at | POU domain, class 3, transcription factor 2         | Pou3f2 | 18992 <a href="#">Entrez gene</a> |
| 99808_at | homeo box B13                                       | Hoxb13 | 15408 <a href="#">Entrez gene</a> |

## Supplementary Table 4

Genes analyzed from the Figure 1c set of Hemgn-like profile neighbors of induced transcripts based on GO “Transcription” group categorization

| <i>Affymetrix Probe Set ID</i> | <i>Name</i>                                                                                       | <i>Gene</i> | <i>Entrez Gene</i>                 |
|--------------------------------|---------------------------------------------------------------------------------------------------|-------------|------------------------------------|
| 101305_at                      | POU domain, class 3, transcription factor 3                                                       | Pou3f3      | 18993 <a href="#">Entrez gene</a>  |
| 101310_at                      | T-cell acute lymphocytic leukemia 2                                                               | Tal2        | 21350 <a href="#">Entrez gene</a>  |
| 102643_at                      | homeo box A2                                                                                      | Hoxa2       | 15399 <a href="#">Entrez gene</a>  |
| 102715_at                      | nuclear receptor subfamily 2, group F, member 1                                                   | Nr2f1       | 13865 <a href="#">Entrez gene</a>  |
| 102882_at                      | zinc finger protein 46                                                                            | Zfp46       | 22704 <a href="#">Entrez gene</a>  |
| 103204_r_at                    | E2F transcription factor 8                                                                        | E2f8        | 108961 <a href="#">Entrez gene</a> |
| 103229_at                      | nuclear receptor coactivator 1                                                                    | Ncoa1       | 17977 <a href="#">Entrez gene</a>  |
| 103990_at                      | FBJ osteosarcoma oncogene B                                                                       | Fosb        | 14282 <a href="#">Entrez gene</a>  |
| 104292_at                      | eyes absent 2 homolog (Drosophila)                                                                | Eya2        | 14049 <a href="#">Entrez gene</a>  |
| 104408_s_at                    | SRY-box containing gene 18                                                                        | Sox18       | 20672 <a href="#">Entrez gene</a>  |
| 160109_at                      | SRY-box containing gene 4                                                                         | Sox4        | 20677 <a href="#">Entrez gene</a>  |
| 161340_r_at                    | paired-like homeodomain transcription factor 2                                                    | Pitx2       | 18741 <a href="#">Entrez gene</a>  |
| 161521_at                      | protein phosphatase 1, regulatory (inhibitor) subunit 12C                                         | Ppp1r12c    | 232807 <a href="#">Entrez gene</a> |
| 161858_f_at                    | retinoblastoma 1                                                                                  | Rb1         | 19645 <a href="#">Entrez gene</a>  |
| 161965_r_at                    | SWI/SNF related, matrix associated, actin dependent regulator of chromatin, subfamily d, member 2 | Smarcd2     | 83796 <a href="#">Entrez gene</a>  |
| 162016_f_at                    | forkhead box C2                                                                                   | Foxc2       | 14234 <a href="#">Entrez gene</a>  |
| 92249_g_at                     | nuclear receptor subfamily 4, group A, member 2                                                   | Nr4a2       | 18227 <a href="#">Entrez gene</a>  |

|            |                                                        |          |                                    |
|------------|--------------------------------------------------------|----------|------------------------------------|
| 92342_at   | SRY-box containing gene 1                              | Sox1     | 20664 <a href="#">Entrez gene</a>  |
| 92697_at   | forkhead box A1                                        | Foxa1    | 15375 <a href="#">Entrez gene</a>  |
| 92705_at   | T-box 2                                                | Tbx2     | 21385 <a href="#">Entrez gene</a>  |
| 92781_at   | thymopoietin                                           | Tmpo     | 21917 <a href="#">Entrez gene</a>  |
| 92926_at   | myeloproliferative leukemia virus oncogene             | Mpl      | 17480 <a href="#">Entrez gene</a>  |
| 92933_at   | POU domain, class 2, transcription factor 3            | Pou2f3   | 18988 <a href="#">Entrez gene</a>  |
| 92935_at   | CBFA2T1 identified gene homolog (human)                | Cbfa2t1h | 12395 <a href="#">Entrez gene</a>  |
| 93616_g_at | pre B-cell leukemia transcription factor 3             | Pbx3     | 18516 <a href="#">Entrez gene</a>  |
| 97123_at   | nuclear receptor subfamily 0, group B, member 2        | Nr0b2    | 23957 <a href="#">Entrez gene</a>  |
| 97704_at   | elongation factor RNA polymerase II 2                  | Ell2     | 192657 <a href="#">Entrez gene</a> |
| 97777_at   | NK2 transcription factor related, locus 5 (Drosophila) | Nkx2-5   | 18091 <a href="#">Entrez gene</a>  |
| 97937_at   | Kruppel-like factor 5                                  | Klf5     | 12224 <a href="#">Entrez gene</a>  |
| 98073_at   | cut-like 1 (Drosophila)                                | Cutl1    | 13047 <a href="#">Entrez gene</a>  |
| 99527_at   | nuclear factor, erythroid derived 2, like 3            | Nfe213   | 18025 <a href="#">Entrez gene</a>  |

## Supplementary Table 5

Genes analyzed from the Figure 1c set of Apobec2-like profile neighbors of induced transcripts based on GO “Transcription” group categorization

| <i>Affymetrix Probe Set ID</i> | <i>Name</i>                                                    | <i>Gene</i>   | <i>Entrez Gene</i>                    |
|--------------------------------|----------------------------------------------------------------|---------------|---------------------------------------|
| 100301_at                      | estrogen related receptor, beta                                | Esrrb         | 26380<br><a href="#">Entrez gene</a>  |
| 101059_at                      | necdin                                                         | Ndn           | 17984<br><a href="#">Entrez gene</a>  |
| 101704_at                      | hepatocyte nuclear factor 4, gamma                             | Hnf4g         | 30942<br><a href="#">Entrez gene</a>  |
| 102235_at                      | lung carcinoma myc related oncogene 1                          | Lmyc1         | 16918<br><a href="#">Entrez gene</a>  |
| 102580_r_at                    | homeo box A6                                                   | Hoxa6         | 15403<br><a href="#">Entrez gene</a>  |
| 102716_at                      | eyes absent 3 homolog (Drosophila)                             | Eya3          | 14050<br><a href="#">Entrez gene</a>  |
| 103050_at                      | transcription factor 21                                        | Tcf21         | 21412<br><a href="#">Entrez gene</a>  |
| 103761_at                      | transcription factor CP2-like 1                                | Tcfcp211      | 81879<br><a href="#">Entrez gene</a>  |
| 104494_at                      | RIKEN cDNA 4921515A04 gene                                     | 4921515A04Rik | 268301<br><a href="#">Entrez gene</a> |
| 104506_at                      | nuclear receptor subfamily 1, group I, member 3                | Nr1i3         | 12355<br><a href="#">Entrez gene</a>  |
| 104592_i_at                    | myocyte enhancer factor 2C                                     | Mef2c         | 17260<br><a href="#">Entrez gene</a>  |
| 160615_at                      | protein inhibitor of activated STAT 3                          | Pias3         | 229615<br><a href="#">Entrez gene</a> |
| 161798_r_at                    | general transcription factor IIIC, polypeptide 4               | Gtf3c4        | 269252<br><a href="#">Entrez gene</a> |
| 92334_at                       | transcriptional regulator protein                              | MGI:1927479   | 57230<br><a href="#">Entrez gene</a>  |
| 92445_at                       | calcium channel, voltage-dependent, P/Q type, alpha 1A subunit | Cacna1a       | 12286<br><a href="#">Entrez gene</a>  |
| 92469_at                       | secreted frizzled-related sequence protein 4                   | Sfrp4         | 20379<br><a href="#">Entrez gene</a>  |
| 92726_at                       | SRY-box containing gene 6                                      | Sox6          | 20679<br><a href="#">Entrez gene</a>  |

|            |                                                                                       |               |                                       |
|------------|---------------------------------------------------------------------------------------|---------------|---------------------------------------|
| 92753_at   | myeloid ecotropic viral integration site-related gene 2                               | Mrg2          | 17537<br><a href="#">Entrez gene</a>  |
| 92990_at   | zinc finger protein 93                                                                | Zfp93         | 22755<br><a href="#">Entrez gene</a>  |
| 93075_r_at | nuclear factor of activated T-cells, cytoplasmic, calcineurin-dependent 2             | Nfatc2        | 18019<br><a href="#">Entrez gene</a>  |
| 94203_at   | RIKEN cDNA A630025C20 gene                                                            | A630025C20Rik | 212391<br><a href="#">Entrez gene</a> |
| 96507_at   | even skipped homeotic gene 2 homolog                                                  | Evx2          | 14029<br><a href="#">Entrez gene</a>  |
| 96994_at   | hypermethylated in cancer 1                                                           | Hic1          | 15248<br><a href="#">Entrez gene</a>  |
| 97159_at   | autoimmune regulator (autoimmune polyendocrinopathy candidiasis ectodermal dystrophy) | Aire          | 11634<br><a href="#">Entrez gene</a>  |
| 97745_at   | homeo box A4                                                                          | Hoxa4         | 15401<br><a href="#">Entrez gene</a>  |
| 98821_at   | insulin promoter factor 1, homeodomain transcription factor                           | Ipfl          | 18609<br><a href="#">Entrez gene</a>  |
| 99900_at   | cone-rod homeobox containing gene                                                     | Crx           | 12951<br><a href="#">Entrez gene</a>  |

## Supplementary Table 6

Genes analyzed from the set of 6-hour down-regulated transcripts obtained by K-means clustering of the expression profiling data based on GO “Transcription” group categorization

| <i>Affymetrix Probe Set ID</i> | <i>Name</i>                                      | <i>Gene</i> | <i>Entrez Gene</i>                 |
|--------------------------------|--------------------------------------------------|-------------|------------------------------------|
| 101162_at                      | myogenic factor 5                                | Myf5        | 17877 <a href="#">Entrez gene</a>  |
| 101396_at                      | transcription factor 2                           | Tcf2        | 21410 <a href="#">Entrez gene</a>  |
| 101904_at                      | SET and MYND domain containing 1                 | Smyd1       | 12180 <a href="#">Entrez gene</a>  |
| 102048_at                      | ankyrin repeat domain 1 (cardiac muscle)         | Ankrd1      | 107765 <a href="#">Entrez gene</a> |
| 102087_at                      | homeo box A3                                     | Hoxa3       | 15400 <a href="#">Entrez gene</a>  |
| 102579_f_at                    | homeo box A6                                     | Hoxa6       | 15403 <a href="#">Entrez gene</a>  |
| 102668_at                      | peroxisome proliferator activated receptor alpha | Ppara       | 19013 <a href="#">Entrez gene</a>  |
| 102955_at                      | nuclear factor, interleukin 3, regulated         | Nfil3       | 18030 <a href="#">Entrez gene</a>  |
| 103283_at                      | E74-like factor 5                                | Elf5        | 13711 <a href="#">Entrez gene</a>  |
| 104240_at                      | cut-like 1 (Drosophila)                          | Cutl1       | 13047 <a href="#">Entrez gene</a>  |
| 104590_at                      | myocyte enhancer factor 2C                       | Mef2c       | 17260 <a href="#">Entrez gene</a>  |
| 160604_at                      | forkhead box C1                                  | Foxc1       | 17300 <a href="#">Entrez gene</a>  |
| 160731_at                      | RAB25, member RAS oncogene family                | Rab25       | 53868 <a href="#">Entrez gene</a>  |
| 161418_r_at                    | nuclear receptor subfamily 5, group A, member 1  | Nr5a1       | 26423 <a href="#">Entrez gene</a>  |
| 161584_r_at                    | E74-like factor 1                                | Elf1        | 13709 <a href="#">Entrez gene</a>  |
| 162314_at                      | CCR4-NOT transcription complex, subunit 7        | Cnot7       | 18983 <a href="#">Entrez gene</a>  |
| 92248_at                       | nuclear receptor subfamily 4, group A, member 2  | Nr4a2       | 18227 <a href="#">Entrez gene</a>  |

|            |                                                                                                                  |                                |                                                                                                                     |
|------------|------------------------------------------------------------------------------------------------------------------|--------------------------------|---------------------------------------------------------------------------------------------------------------------|
| 92255_at   | homeo box B4                                                                                                     | Hoxb4                          | 15412 <a href="#">Entrez gene</a>                                                                                   |
| 92344_at   | SWI/SNF related, matrix associated, actin dependent regulator of chromatin, subfamily a, member 3                | Smarca3                        | 20585 <a href="#">Entrez gene</a>                                                                                   |
| 92535_at   | early B-cell factor 1                                                                                            | Ebf1                           | 13591 <a href="#">Entrez gene</a>                                                                                   |
| 92614_at   | inhibitor of DNA binding 3                                                                                       | Id3                            | 15903 <a href="#">Entrez gene</a>                                                                                   |
| 92717_at   | neurogenic differentiation 1                                                                                     | Neurod1                        | 18012 <a href="#">Entrez gene</a>                                                                                   |
| 92883_at   | RAB1, member RAS oncogene family                                                                                 | Rab1                           | 19324 <a href="#">Entrez gene</a>                                                                                   |
| 92891_f_at | homeo box C9                                                                                                     | Hoxc9                          | 15427 <a href="#">Entrez gene</a>                                                                                   |
| 92894_s_at | nuclear factor I/A                                                                                               | Nfia                           | 18027 <a href="#">Entrez gene</a>                                                                                   |
| 92896_s_at | single-minded homolog 2 (Drosophila)<br>similar to single-minded 2 protein<br>similar to single-minded 2 protein | Sim2<br>LOC547289<br>LOC547335 | 20465 <a href="#">Entrez gene</a><br>547289<br><a href="#">Entrez gene</a><br>547335<br><a href="#">Entrez gene</a> |
| 92902_at   | myeloblastosis oncogene-like 1                                                                                   | Mybl1                          | 17864 <a href="#">Entrez gene</a>                                                                                   |
| 92999_at   | sine oculis-related homeobox 4 homolog (Drosophila)                                                              | Six4                           | 20474 <a href="#">Entrez gene</a>                                                                                   |
| 93230_at   | neurogenin 1                                                                                                     | Neurog1                        | 18014 <a href="#">Entrez gene</a>                                                                                   |
| 93371_at   | basonuclin 1                                                                                                     | Bnc1                           | 12173 <a href="#">Entrez gene</a>                                                                                   |
| 93418_g_at | myocyte enhancer factor 2B                                                                                       | Mef2b                          | 17259 <a href="#">Entrez gene</a>                                                                                   |
| 93613_at   | MAD homolog 3 (Drosophila)                                                                                       | Smad3                          | 17127 <a href="#">Entrez gene</a>                                                                                   |
| 94100_s_at | transient receptor potential cation channel, subfamily C, member 4                                               | Trpc4                          | 22066 <a href="#">Entrez gene</a>                                                                                   |
| 94636_at   | homeo box A13                                                                                                    | Hoxa13                         | 15398 <a href="#">Entrez gene</a>                                                                                   |
| 94710_g_at | glial cells missing homolog 2 (Drosophila)                                                                       | Gcm2                           | 107889<br><a href="#">Entrez gene</a>                                                                               |
| 95391_at   | ventral anterior homeobox containing gene 1                                                                      | Vax1                           | 22326 <a href="#">Entrez gene</a>                                                                                   |



|          |                                         |        |                                    |
|----------|-----------------------------------------|--------|------------------------------------|
|          |                                         |        | <a href="#">gene</a>               |
| 95584_at | developmental pluripotency associated 2 | Dppa2  | 73703 <a href="#">Entrez gene</a>  |
| 95968_at | expressed sequence C77691               | C77691 | 97222 <a href="#">Entrez gene</a>  |
| 97357_at | myocyte enhancer factor 2C              | Mef2c  | 17260 <a href="#">Entrez gene</a>  |
| 98780_at | homeo box B3                            | Hoxb3  | 15410 <a href="#">Entrez gene</a>  |
| 99058_at | high mobility group AT-hook 2           | Hmga2  | 15364 <a href="#">Entrez gene</a>  |
| 99427_at | homeo box D12                           | Hoxd12 | 15432 <a href="#">Entrez gene</a>  |
| 99432_at | cytoplasmic linker 2                    | Cyln2  | 269713 <a href="#">Entrez gene</a> |
| 99965_at | vitamin D receptor                      | Vdr    | 22337 <a href="#">Entrez gene</a>  |

## Supplementary Table 7

Genes analyzed from the set of 12-hour down-regulated transcripts obtained by K-means clustering of the expression profiling data based on GO “Transcription” group categorization

| <i>Affymetrix Probe Set ID</i> | <i>Name</i>                                                                        | <i>Gene</i> | <i>Entrez Gene</i>                 |
|--------------------------------|------------------------------------------------------------------------------------|-------------|------------------------------------|
| 100130_at                      | Jun oncogene                                                                       | Jun         | 16476 <a href="#">Entrez gene</a>  |
| 100962_at                      | Ngfi-A binding protein 2                                                           | Nab2        | 17937 <a href="#">Entrez gene</a>  |
| 101797_at                      | sine oculis-related homeobox 6 homolog (Drosophila)                                | Six6        | 20476 <a href="#">Entrez gene</a>  |
| 102984_g_at                    | MAD homolog 1 (Drosophila)                                                         | Smad1       | 17125 <a href="#">Entrez gene</a>  |
| 103925_at                      | myeloid/lymphoid or mixed lineage-leukemia translocation to 3 homolog (Drosophila) | Mllt3       | 70122 <a href="#">Entrez gene</a>  |
| 104233_at                      | TEA domain family member 1                                                         | Tead1       | 21676 <a href="#">Entrez gene</a>  |
| 104376_at                      | histone deacetylase 5                                                              | Hdac5       | 15184 <a href="#">Entrez gene</a>  |
| 104381_at                      | nuclear receptor subfamily 1, group H, member 3                                    | Nr1h3       | 22259 <a href="#">Entrez gene</a>  |
| 104462_at                      | hypermethylated in cancer 1                                                        | Hic1        | 15248 <a href="#">Entrez gene</a>  |
| 104698_at                      | GATA binding protein 6                                                             | Gata6       | 14465 <a href="#">Entrez gene</a>  |
| 160901_at                      | FBJ osteosarcoma oncogene                                                          | Fos         | 14281 <a href="#">Entrez gene</a>  |
| 161113_at                      | estrogen receptor 1 (alpha)                                                        | Esr1        | 13982 <a href="#">Entrez gene</a>  |
| 161383_r_at                    | TEA domain family member 1                                                         | Tead1       | 21676 <a href="#">Entrez gene</a>  |
| 161390_r_at                    | POU domain, class 6, transcription factor 1                                        | Pou6f1      | 19009 <a href="#">Entrez gene</a>  |
| 161468_f_at                    | Heart and neural crest derivatives expressed transcript 1 (Hand1), mRNA            | Hand1       | 15110 <a href="#">Entrez gene</a>  |
| 161699_i_at                    | interferon regulatory factor 6                                                     | Irf6        | 54139 <a href="#">Entrez gene</a>  |
| 161994_f_at                    | protein inhibitor of activated STAT 3                                              | Pias3       | 229615 <a href="#">Entrez gene</a> |
| 92186_at                       | aristaless related homeobox gene (Drosophila)                                      | Arx         | 11878 <a href="#">Entrez</a>       |

|            |                                                            |               |                                                                        |
|------------|------------------------------------------------------------|---------------|------------------------------------------------------------------------|
|            |                                                            |               | <a href="#">gene</a>                                                   |
| 92667_at   | androgen receptor                                          | Ar            | 11835 <a href="#">Entrez gene</a>                                      |
| 92910_at   | aryl hydrocarbon receptor nuclear translocator 2           | Arnt2         | 11864 <a href="#">Entrez gene</a>                                      |
| 92930_at   | distal-less homeobox 5                                     | Dlx5          | 13395 <a href="#">Entrez gene</a>                                      |
| 92974_at   | zinc finger protein 37                                     | Zfp37         | 22696 <a href="#">Entrez gene</a>                                      |
| 93142_at   | BTB and CNC homology 1                                     | Bach1         | 12013 <a href="#">Entrez gene</a>                                      |
| 93350_f_at | zinc finger protein 422                                    | Zfp422        | 67255 <a href="#">Entrez gene</a>                                      |
| 93528_s_at | Kruppel-like factor 9                                      | Klf9          | 16601 <a href="#">Entrez gene</a>                                      |
| 93601_at   | kelch-like ECH-associated protein 1                        | Keap1         | 50868 <a href="#">Entrez gene</a>                                      |
| 93657_at   | Spi-B transcription factor (Spi-1/PU.1 related)            | Spib          | 272382 <a href="#">Entrez gene</a>                                     |
| 93728_at   | TSC22 domain family, member 1                              | Tsc22d1       | 21807 <a href="#">Entrez gene</a>                                      |
| 94687_at   | forkhead box B1                                            | Foxb1         | 64290 <a href="#">Entrez gene</a>                                      |
| 94811_s_at | general transcription factor II H, polypeptide 1<br>necdin | Gtf2h1<br>Ndn | 14884 <a href="#">Entrez gene</a><br>17984 <a href="#">Entrez gene</a> |
| 95315_at   | RIKEN cDNA 4732429I09 gene                                 | 4732429I09Rik | 243906 <a href="#">Entrez gene</a>                                     |
| 96580_at   | pre B-cell leukemia transcription factor 3                 | Pbx3          | 18516 <a href="#">Entrez gene</a>                                      |
| 96940_at   | TEA domain family member 2                                 | Tead2         | 21677 <a href="#">Entrez gene</a>                                      |
| 96993_at   | paired box gene 5                                          | Pax5          | 18507 <a href="#">Entrez gene</a>                                      |
| 97193_at   | Transcription factor CP2-like 1 (Tcfcp2l1), mRNA           | Tcfcp2l1      | 81879 <a href="#">Entrez gene</a>                                      |
| 97497_at   | Notch gene homolog 1 (Drosophila)                          | Notch1        | 18128 <a href="#">Entrez gene</a>                                      |
| 97747_r_at | homeo box A4                                               | Hoxa4         | 15401 <a href="#">Entrez gene</a>                                      |

|          |                                                           |          |                                    |
|----------|-----------------------------------------------------------|----------|------------------------------------|
| 98083_at | Kruppel-like factor 6 (Klf6), mRNA                        | Copeb    | 23849 <a href="#">Entrez gene</a>  |
| 98340_at | expressed sequence AA407331                               | AA407331 | 106839 <a href="#">Entrez gene</a> |
| 98579_at | early growth response 1                                   | Egr1     | 13653 <a href="#">Entrez gene</a>  |
| 98838_at | paired box gene 9                                         | Pax9     | 18511 <a href="#">Entrez gene</a>  |
| 99665_at | special AT-rich sequence binding protein 1                | Satb1    | 20230 <a href="#">Entrez gene</a>  |
| 99875_at | hairless                                                  | Hr       | 15460 <a href="#">Entrez gene</a>  |
| 99901_at | polymerase I and transcript release factor                | Ptrf     | 19285 <a href="#">Entrez gene</a>  |
| 99914_at | heart and neural crest derivatives expressed transcript 2 | Hand2    | 15111 <a href="#">Entrez gene</a>  |

## Supplementary Table 8

Motifs identified in the promoter regions of the genes analyzed from the Figure 1c subtrees of induced transcripts based on Gene Ontology (GO) “Transcription” group categorization (see Supplementary Table 1)

| <i>Motif</i>                      | <i>Raw Score</i> | <i>P-value (from randomizing matrix)</i> |
|-----------------------------------|------------------|------------------------------------------|
| M00791 HNF-3                      | 140              | 0.002                                    |
| M00422 FOXJ2                      | 139              | 0.007                                    |
| M00933 Sp1                        | 130              | 0.002                                    |
| M00932 Sp1                        | 122              | 0                                        |
| M00196 Sp1                        | 114              | 0                                        |
| M00931 Sp1                        | 111              | 0                                        |
| M00720 CAC-binding protein (KLF1) | 92.5             | 0.001                                    |
| M00289 HFH-3                      | 87.4             | 0.003                                    |
| M00255 GC box                     | 87.1             | 0                                        |
| M01068 UF1H3BETA                  | 84.8             | 0                                        |
| M00302 NF-AT                      | 66.6             | 0.006                                    |
| M00403 aMEF-2                     | 66.1             | 0.002                                    |
| M00405 MEF-2                      | 63.1             | 0.001                                    |
| M00500 STAT6                      | 62.5             | 0.008                                    |
| M00238 Barbie box                 | 51.5             | 0.003                                    |
| M00808 Pax                        | 41.9             | 0                                        |
| M00141 Lyf-1                      | 39.6             | 0.003                                    |
| M00804 E2A                        | 36.7             | 0.002                                    |
| M00793 YY1                        | 36               | 0                                        |
| M00648 MAF                        | 35.9             | 0.004                                    |
| M00287 NF-Y (CCAAT)               | 33.5             | 0                                        |
| M00340 c-Ets-2                    | 33               | 0.006                                    |
| M00979 PAX6                       | 32.6             | 0                                        |
| M00929 MyoD                       | 31.9             | 0.009                                    |
| M00175 AP-4                       | 31.8             | 0.001                                    |
| M00777 STAT                       | 31.4             | 0.006                                    |

|                                             |      |       |
|---------------------------------------------|------|-------|
| M00794 TTF-1                                | 31   | 0.01  |
| M00006 MEF-2                                | 29.4 | 0.003 |
| M00644 LBP-1                                | 28.8 | 0.009 |
| M00291 Freac-3                              | 27.4 | 0.007 |
| M00927 AP-4                                 | 25.7 | 0.009 |
| M00176 AP-4                                 | 25   | 0.01  |
| M00531 NERF1a                               | 23.7 | 0.001 |
| M00254 CCAAT                                | 22.3 | 0.001 |
| M00983 MAF                                  | 22.2 | 0.003 |
| M00775 NF-Y (CCAAT)                         | 20.3 | 0     |
| M00209 NF-Y (CCAAT)                         | 19.6 | 0     |
| M00069 YY1                                  | 19.2 | 0     |
| M00687  $\alpha$ -CP1 $\equiv$ NF-Y (CCAAT) | 15   | 0.002 |
| M00185 NF-Y (CCAAT)                         | 14.2 | 0.006 |
| M00264 Staf                                 | 13.7 | 0.001 |
| M00005 AP-4                                 | 12.8 | 0.003 |
| M00526 GCNF                                 | 10   | 0     |
| M00261 Olf-1                                | 5.18 | 0.007 |

---

Listed are over-represented motifs within promoter regions identified using Clover (Cis-eLement OVERrepresentation) software (Frith *et al.*, 2004) and position frequency matrices derived from transcription factor binding sites from the TRANSFAC<sup>®</sup> Professional database (Release 9.3) (Matys *et al.*, 2003). The raw score quantifies the degree of the presence of the motif in the gene set and the *P*-value indicates the probability of obtaining a raw score of this size or greater by chance. If the *P*-value is very low (e.g.,  $\leq 0.01$ ), the motif is considered to be significantly over-represented in the gene set. Motifs highlighted in blue, which are specifically present in this and the Ccne1-like, Hba-x-like and Hemgn-like gene sets, are discussed in the text.

## Supplementary Table 9

Motifs identified in the promoter regions of the genes analyzed from the Figure 1c set of Ccne1-like profile neighbors of induced transcripts based on GO “Transcription” group categorization (see Supplementary Table 2)

| <i>Motif</i>                                      | <i>Raw Score</i>     | <i>P-value (from randomizing matrix)</i> |
|---------------------------------------------------|----------------------|------------------------------------------|
| M00933 Sp1                                        | 89.7                 | 0.004                                    |
| M00932 Sp1                                        | 83.9                 | 0                                        |
| M00196 Sp1                                        | 79.3                 | 0                                        |
| M00422 FOXJ2                                      | 78.9                 | 0.003                                    |
| M01068 UF1H3BETA                                  | 72.4                 | 0                                        |
| M00931 Sp1                                        | 71.9                 | 0.001                                    |
| <a href="#">M00720 CAC-binding protein (KLF1)</a> | <a href="#">57.4</a> | <a href="#">0.002</a>                    |
| M00255 GC box                                     | 56.9                 | 0.001                                    |
| M00302 NF-AT                                      | 50.6                 | 0.001                                    |
| M00238 Barbie box                                 | 37.8                 | 0.004                                    |
| M00971 Ets                                        | 36.9                 | 0.009                                    |
| M00771 ETS                                        | 33.8                 | 0.003                                    |
| M00216 TATA                                       | 31.2                 | 0.01                                     |
| M00935 NF-AT                                      | 29.1                 | 0.002                                    |
| M00793 YY1                                        | 28.2                 | 0                                        |
| M00648 MAF                                        | 27.8                 | 0.003                                    |
| M00712 myogenin                                   | 24.7                 | 0.009                                    |
| M00929 MyoD                                       | 24.4                 | 0.002                                    |
| M00340 c-Ets-2                                    | 24.2                 | 0.003                                    |
| M00141 Lyf-1                                      | 23.5                 | 0.005                                    |
| M00777 STAT                                       | 23.4                 | 0.003                                    |
| M00339 c-Ets-1                                    | 22.9                 | 0.007                                    |
| M00804 E2A                                        | 22.1                 | 0.006                                    |
| M00644 LBP-1                                      | 22.1                 | 0.001                                    |
| M00175 AP-4                                       | 21.6                 | 0.001                                    |
| M01035 YY1                                        | 21.4                 | 0.007                                    |

|                            |             |              |
|----------------------------|-------------|--------------|
| M00808 Pax                 | 20.4        | 0            |
| M00927 AP-4                | 19.8        | 0.002        |
| M00176 AP-4                | 18.1        | 0.005        |
| M00979 PAX6                | 17.7        | 0            |
| M00531 NERF1a              | 16.8        | 0.001        |
| <b>M00277 Lmo2 complex</b> | <b>15</b>   | <b>0.007</b> |
| M00005 AP-4                | 14.2        | 0            |
| M00974 SMAD                | 12.5        | 0.01         |
| M00002 E47                 | 9.81        | 0.008        |
| M00638 HNF-4alpha          | 9.75        | 0.003        |
| M01031 HNF4                | 8.38        | 0.008        |
| M00733 SMAD-4              | 8.16        | 0.007        |
| M00212 Retroviral poly A   | 7.53        | 0.009        |
| M00069 YY1                 | 7.39        | 0.006        |
| <b>M00287 NF-Y (CCAAT)</b> | <b>6.59</b> | <b>0.004</b> |
| M00135 Oct-1               | 5.7         | 0.006        |

---

The motif highlighted in **red**, which is specifically present in this and the Hba-x-like gene set, is discussed in the text.



## Supplementary Table 10

Motifs identified in the promoter regions of the genes analyzed from the Figure 1c set of Hba-x-like profile neighbors of induced transcripts based on GO “Transcription” group categorization (see Supplementary Table 3)

| <i>Motif</i>                                | <i>Raw Score</i> | <i>P-value (from randomizing matrix)</i> |
|---------------------------------------------|------------------|------------------------------------------|
| M00933 Sp-1                                 | 72.8             | 0.005                                    |
| M00979 PAX6                                 | 67.3             | 0                                        |
| M00932 Sp-1                                 | 63.3             | 0.002                                    |
| M00196 Sp1                                  | 61.6             | 0.004                                    |
| M00931 Sp-1                                 | 59.1             | 0.001                                    |
| M00255 GC box                               | 57.9             | 0.001                                    |
| M00720 CAC-binding protein (KLF1)           | 50.7             | 0.01                                     |
| M00808 Pax                                  | 48.6             | 0                                        |
| M00302 NF-AT                                | 37.7             | 0.001                                    |
| M00238 Barbie box                           | 30.8             | 0.006                                    |
| M00141 Lyf-1                                | 23.8             | 0.001                                    |
| M00482 PITX2                                | 22.2             | 0                                        |
| M00804 E2A                                  | 21.3             | 0.001                                    |
| M00622 C/EBP $\gamma$ (CCAAT)               | 20.6             | 0.01                                     |
| M00929 MyoD                                 | 19.8             | 0.008                                    |
| M00777 STAT                                 | 18.8             | 0.003                                    |
| M00277 Lmo2 complex                         | 15               | 0.004                                    |
| M00794 TTF-1                                | 15               | 0.005                                    |
| M00526 GCNF                                 | 14               | 0                                        |
| M00175 AP-4                                 | 13.6             | 0.009                                    |
| M00531 NERF1a                               | 10.6             | 0.008                                    |
| M00287 NF-Y (CCAAT)                         | 10.3             | 0.001                                    |
| M00193 NF-1                                 | 9.48             | 0.006                                    |
| M00005 AP-4                                 | 9.41             | 0.006                                    |
| M00687  $\alpha$ -CP1 $\equiv$ NF-Y (CCAAT) | 6.28             | 0.009                                    |

## Supplementary Table 11

Motifs identified in the promoter regions of the genes analyzed from the Figure 1c set of Hemgn-like profile neighbors of induced transcripts based on GO “Transcription” group categorization (see Supplementary Table 4)

| <i>Motif</i>                                | <i>Raw Score</i> | <i>P-value (from randomizing matrix)</i> |
|---------------------------------------------|------------------|------------------------------------------|
| M00720 CAC-binding protein (KLF1)           | 32.9             | 0.001                                    |
| M00238 Barbie box                           | 30               | 0.002                                    |
| M00302 NF-AT                                | 26.7             | 0.003                                    |
| M00808 Pax                                  | 21               | 0                                        |
| M00979 PAX6                                 | 19.5             | 0                                        |
| M00141 Lyf-1                                | 17.4             | 0.002                                    |
| M00777 STAT                                 | 16.3             | 0.001                                    |
| M00804 E2A                                  | 15.5             | 0.002                                    |
| M01036 COUPTF                               | 13.7             | 0.008                                    |
| M00531 NERF1a                               | 11               | 0.002                                    |
| M00794 TTF-1                                | 9.7              | 0.003                                    |
| M00193 NF-1                                 | 6.28             | 0.008                                    |
| M00687  $\alpha$ -CP1 $\equiv$ NF-Y (CCAAT) | 5.98             | 0.001                                    |
| M00158 COUP-TF, HNF-4                       | 5.59             | 0.006                                    |
| M00733 SMAD-4                               | 3.89             | 0.01                                     |
| M00287 NF-Y (CCAAT)                         | 3.37             | 0.006                                    |

## Supplementary Table 12

Motifs identified in the promoter regions of the genes analyzed from the Figure 1c set of Apobec2-like profile neighbors of induced transcripts based on GO “Transcription” group categorization (see Supplementary Table 5)

| <i>Motif</i>                          | <i>Raw Score</i> | <i>P-value (from randomizing matrix)</i> |
|---------------------------------------|------------------|------------------------------------------|
| M00933 Sp-1                           | 52.4             | 0                                        |
| M00931 Sp-1                           | 50               | 0.001                                    |
| M00932 Sp-1                           | 49.2             | 0                                        |
| M00196 Sp1                            | 49.1             | 0                                        |
| M00255 GC box                         | 37.9             | 0                                        |
| M00979 PAX6                           | 35               | 0                                        |
| M00808 Pax                            | 26.9             | 0                                        |
| M00302 NF-AT                          | 22.2             | 0                                        |
| M00929 MyoD                           | 17               | 0.01                                     |
| M00804 E2A                            | 13.7             | 0.008                                    |
| M00935 NF-AT                          | 13               | 0.004                                    |
| M00977 EBF                            | 12.9             | 0.01                                     |
| M00777 STAT                           | 12.3             | 0.004                                    |
| M00158 COUP-TF, hnf-4                 | 12.3             | 0                                        |
| M01028 NRSF                           | 12.1             | 0.001                                    |
| M01031 HNF4                           | 11.4             | 0.005                                    |
| M00256 NRSF                           | 8.55             | 0                                        |
| <b>M00250 Gfi-1</b>                   | <b>8.31</b>      | <b>0.01</b>                              |
| M00325 neural-restr.-silencer-element | 6.45             | 0.003                                    |

The motif highlighted in **green**, which is specifically present in this gene set, is discussed in the text.

### Supplementary Table 13

Motifs identified in the promoter regions of the genes analyzed from the set of 6-hour down-regulated transcripts obtained by K-means clustering of the expression profiling data based on GO “Transcription” group categorization (see Supplementary Table 6)

| <i>Motif</i>              | <i>Raw Score</i> | <i>P-value (from randomizing matrix)</i> |
|---------------------------|------------------|------------------------------------------|
| M00932 Sp-1               | 77.7             | 0.002                                    |
| M00196 Sp1                | 73.2             | 0.003                                    |
| M00931 Sp-1               | 68.4             | 0.006                                    |
| M01010 HMGIY              | 60.4             | 0.004                                    |
| M00255 GC box             | 53.8             | 0.009                                    |
| M00979 PAX6               | 39.7             | 0                                        |
| M00302 NF-AT              | 34.9             | 0.01                                     |
| M00808 Pax                | 34.8             | 0                                        |
| M00804 E2A                | 31.5             | 0                                        |
| M01036 COUPTF             | 26.4             | 0                                        |
| M00141 Lyf-1              | 25.9             | 0.002                                    |
| M00929 MyoD               | 22.8             | 0.005                                    |
| M00777 STAT               | 20.5             | 0.008                                    |
| M00974 SMAD               | 18.1             | 0.004                                    |
| M00087 Ik-2               | 16.2             | 0.006                                    |
| M00482 PITX2              | 15.3             | 0.002                                    |
| M00175 AP-4               | 12.9             | 0.01                                     |
| M01031 HNF4               | 12.9             | 0.008                                    |
| M00531 NERF1a             | 11.5             | 0.01                                     |
| M00005 AP-4               | 11.1             | 0.004                                    |
| M00158 COUP-TF, HNF-4     | 9.89             | 0.002                                    |
| M00457 STAT5A (homodimer) | 5.84             | 0.007                                    |
| M00459 STAT5B (homodimer) | 4.87             | 0.002                                    |

### Supplementary Table 14

Motifs identified in the promoter regions of the genes analyzed from the set of 12-hour down-regulated transcripts obtained by K-means clustering of the expression profiling data based on GO “Transcription” group categorization (see Supplementary Table 7)

| <i>Motif</i>     | <i>Raw Score</i> | <i>P-value (from randomizing matrix)</i> |
|------------------|------------------|------------------------------------------|
| M00982 KROX      | 100              | 0.009                                    |
| M00933 Sp-1      | 93.4             | 0.006                                    |
| M00196 Sp1       | 88.7             | 0.002                                    |
| M00932 Sp-1      | 88.4             | 0.001                                    |
| M00931 Sp-1      | 79.4             | 0.001                                    |
| M00255 GC box    | 71.5             | 0                                        |
| M00791 HNF-3     | 66.6             | 0.009                                    |
| M00979 PAX6      | 38.6             | 0                                        |
| M00941 MEF-2     | 32.1             | 0.009                                    |
| M00808 Pax       | 26.8             | 0                                        |
| M00141 Lyf-1     | 25.4             | 0.008                                    |
| M00470 AP-2gamma | 23.5             | 0.003                                    |
| M00777 STAT      | 20               | 0.003                                    |
| M00087 Ik-2      | 14.4             | 0.008                                    |
| M00794 TTF-1     | 14               | 0.006                                    |
| M00006 MEF-2     | 10.9             | 0.007                                    |
| M00531 NERF1a    | 10.4             | 0.009                                    |
| M00231 MEF-2     | 6.33             | 0.01                                     |

## Supplementary Table 15

Positionally clustered six-letter “word”, TGATTG, identified in the promoter regions of the genes analyzed from the Figure 1c subtrees of induced transcripts based on Gene Ontology (GO) “Transcription” group categorization (see Supplementary Table 1).

| Rank | Word          | Count     | Pnly per Pos        | Local Max           | P-value             | Mtc P-value         |
|------|---------------|-----------|---------------------|---------------------|---------------------|---------------------|
| 1    | TTCAGT        | 26        | 1.003861e-01        | 5.237365e+00        | 1.057322e-04        | 4.330793e-01        |
| 2    | CCAGCG        | 22        | 8.494208e-02        | 4.376475e+00        | 8.833988e-04        | 3.618401e+00        |
| 3    | GCGCCG        | 41        | 1.583012e-01        | 4.411765e+00        | 1.498340e-03        | 6.137201e+00        |
| 4    | <b>TGATTG</b> | <b>29</b> | <b>1.119691e-01</b> | <b>4.258229e+00</b> | <b>1.594406e-03</b> | <b>6.530688e+00</b> |
| 5    | CTTAGA        | 27        | 1.042471e-01        | 4.221771e+00        | 1.635609e-03        | 6.699453e+00        |
| 6    | GGTGCG        | 22        | 8.494208e-02        | 4.137344e+00        | 1.668312e-03        | 6.833405e+00        |
| 7    | GGGGCG        | 59        | 2.277992e-01        | 4.501486e+00        | 1.698136e-03        | 6.955564e+00        |
| 8    | TGGCGG        | 48        | 1.853282e-01        | 4.416162e+00        | 1.733549e-03        | 7.100615e+00        |
| 9    | CACAAG        | 28        | 1.081081e-01        | 4.189658e+00        | 1.847273e-03        | 7.566429e+00        |
| 10   | GGGCTC        | 47        | 1.814672e-01        | 4.369449e+00        | 1.921873e-03        | 7.871991e+00        |

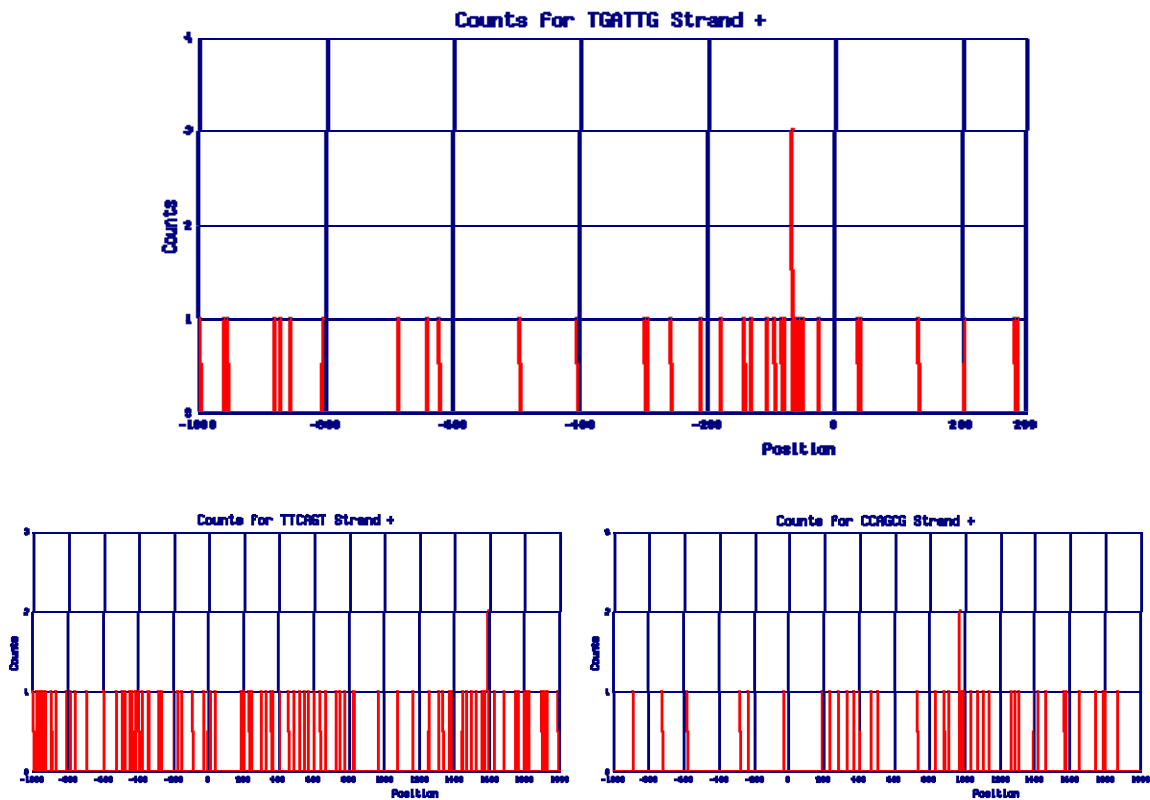

Over-represented six letter “words” were evaluated for cluster significance (representative block alignments are illustrated; transcription start site = position 0) using an enumerative motif finding algorithm (Tharakaraman *et al.*, 2005) and queried for functional relevance through the TRANSFAC public database website (Release 7.0, Biobase GmbH)

<http://www.gene-regulation.com/cgi-bin/pub/databases/transfac/search.cgi> . The only sequence that satisfied these criteria, TGATTG, is discussed in the text.

# Supplementary Figure 1

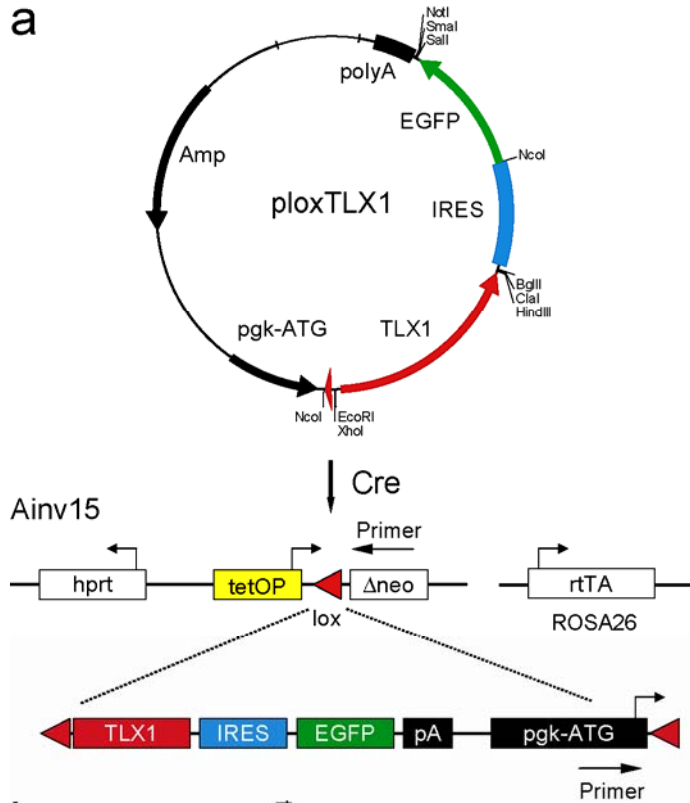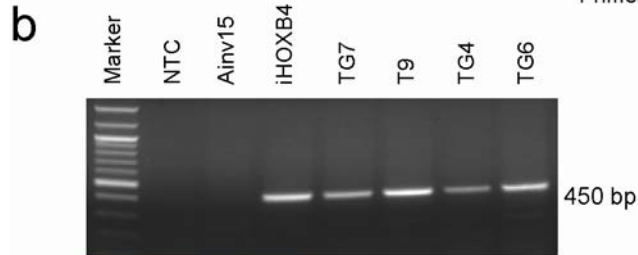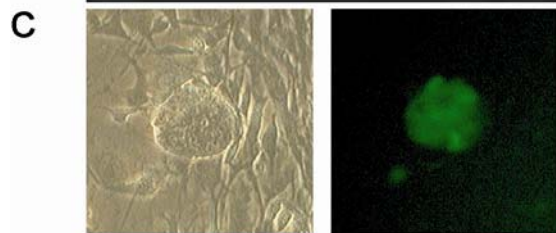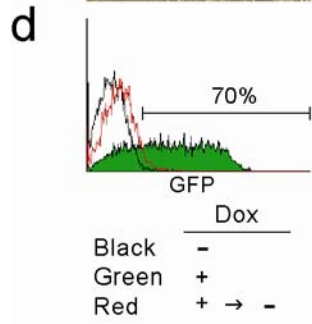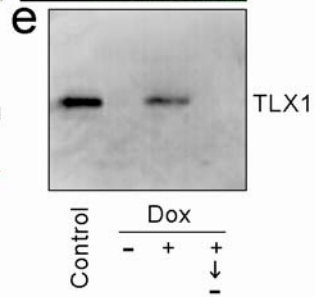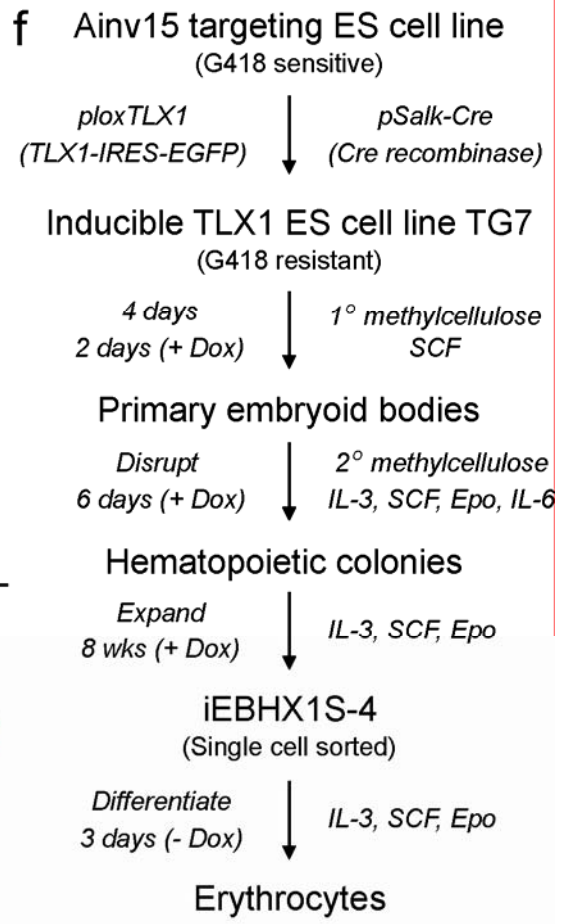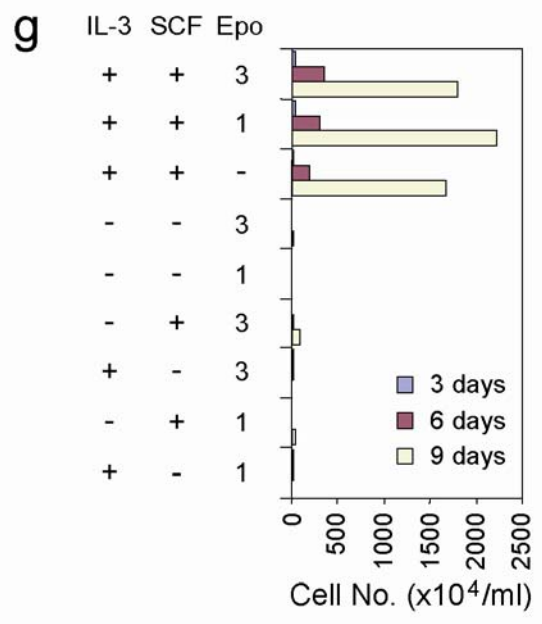

## Supplementary Figure 1 Legend

Generation of a *TLX1*-inducible ESC line and conditionally-arrested iEBHX1S-4 erythroid progenitor cells. **(a)** Schematic representation of the integrated TLX1-IRES-EGFP expression cassette in iTLX1 ES cells. Successful Cre-mediated recombination between the loxP site in the ploxTLX1 targeting plasmid and the loxP site upstream of the *hprt* locus in the Ainv15 ES cell line places the TLX1-IRES-EGFP cassette under the control of a doxycycline-responsive promoter and restores G418 resistance by reconstituting a functional neomycin (*neo*) drug resistance gene. A reverse tetracycline-controlled transactivator (rtTA) responsive to doxycycline is integrated into the constitutive ROSA26 locus. tetOP, rtTA-dependent promoter consisting of tetracycline operator sequences fused to a minimal promoter. **(b)** Individual G418-resistant colonies were picked and expanded. Successful targeting was confirmed by the presence of a diagnostic 450-bp fragment generated by PCR analysis of genomic DNA using primers specific for *pgk* promoter sequences in the ploxTLX1 plasmid and neo sequences in the *hprt* homing site. NTC = no template control; Ainv15 = negative control parental ESC line; iHOXB4 = positive control ESC line containing a doxycycline-inducible HoxB4 cDNA in the *hprt* locus; TG4, TG6 and TG7 = iTLX1 clones containing correctly targeted TLX1-IRES-EGFP cassettes; T9 = iTLX1 clone containing a correctly targeted TLX1 cDNA minus a linked EGFP gene. **(c)** *Left* Bright-field image of TG7 iTLX1 ESCs cultured in the presence of 1  $\mu\text{g/ml}$  doxycycline. *Right* Fluorescence image of the same cells demonstrating GFP expression. **(d)** Flow cytometric analysis of GFP expression in TG7 iTLX1 ESCs grown in the absence of doxycycline (-), grown in the presence of 1  $\mu\text{g/ml}$  doxycycline for 3 days (+), and grown in the presence of 1  $\mu\text{g/ml}$  doxycycline for 3 days and then in the absence of doxycycline for 3 days (+  $\rightarrow$  -). **(e)** Western blot analysis of TLX1 expression in: NIH3T3 cells constitutively expressing *TLX1* (Control); TG7 iTLX1 ESCs grown in the absence of doxycycline (-); TG7 iTLX1 ESCs grown in the



presence of 1  $\mu\text{g/ml}$  doxycycline for 3 days (+); and TG7 iTLX1 ESCs grown in the presence of 1  $\mu\text{g/ml}$  doxycycline for 3 days and then in the absence of doxycycline for 3 days (+  $\rightarrow$  - ). **(f)** Protocol used to generate the iEBHX1S-4 cell line. Abbreviation: Dox, doxycycline. **(g)** Growth factor responsiveness of iEBHX1S-4 cells cultured in the presence of 1  $\mu\text{g/ml}$  doxycycline. Abbreviations: + IL-3, 5% IL-3-conditioned medium; + SCF, 5% SCF-conditioned medium; 1 Epo, 1 U/ml Epo; 3 Epo, 3 U/ml Epo.

## Supplementary Figure 2

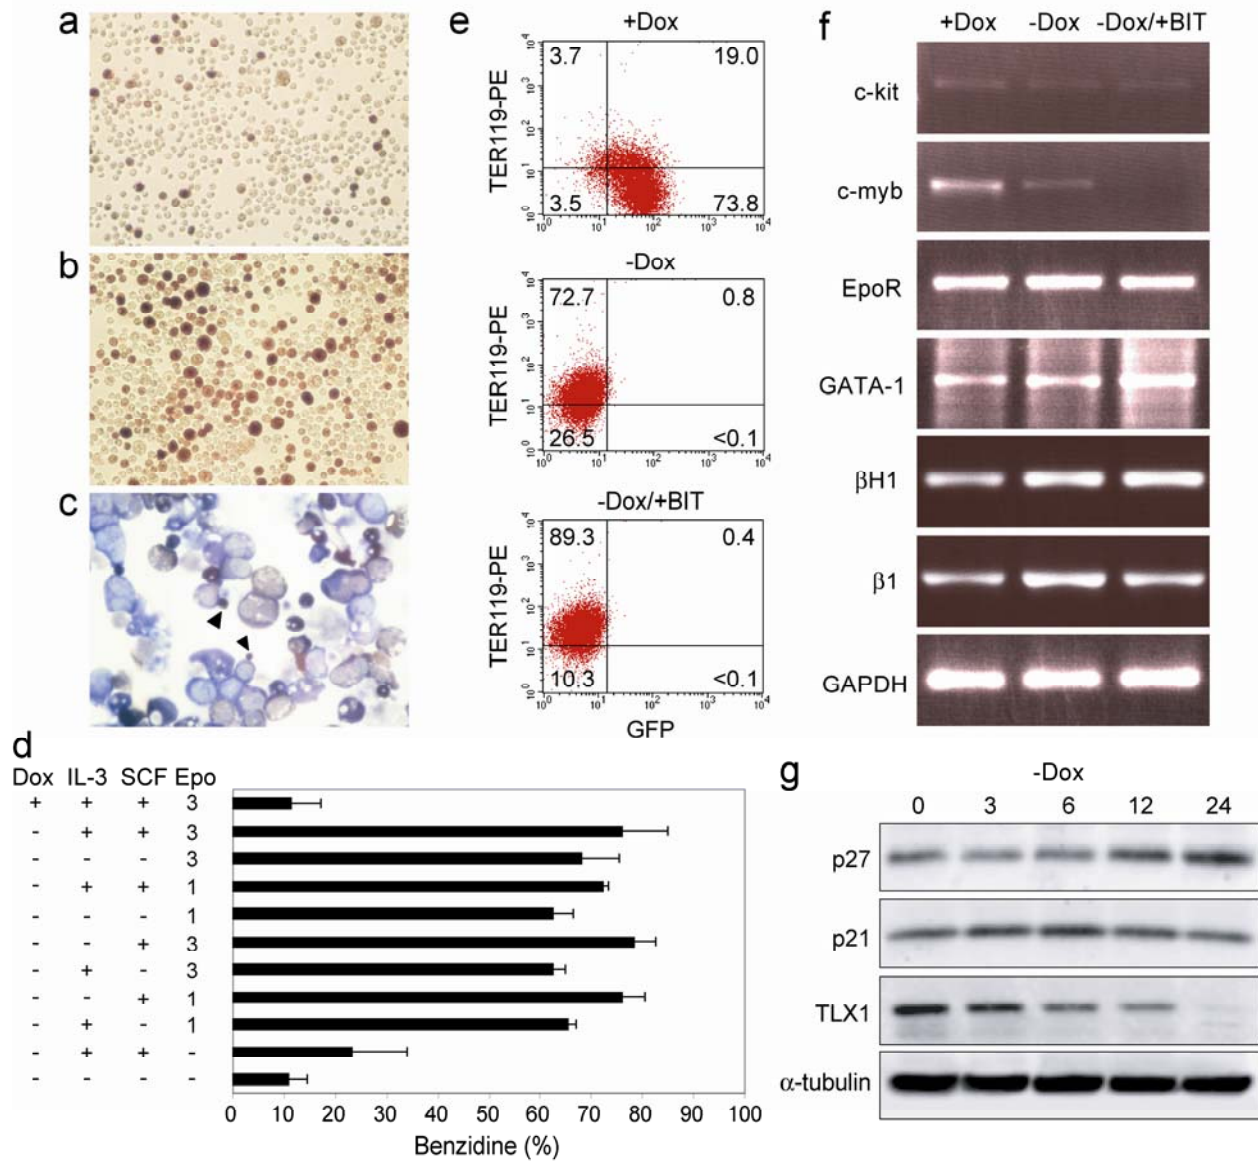

## Supplementary Figure 2 Legend

Erythroid differentiation potential of iEBHX1S-4 cells. Photomicrographs of cultures (**a,b**) and cytopsin preparations (**c**) of benzidine-stained iEBHX1S-4 cells cultured in the presence (**a**) or absence (**b,c**) of 1  $\mu\text{g/ml}$  doxycycline for 3 days. In (**c**), differentiation was carried out in the presence of 5% BIT (bovine serum albumin, insulin and human transferrin). Arrowheads represent enucleated benzidine-positive cells. (**d**) Differentiation of iEBHX1S-4 cells cultured in the absence of doxycycline (Dox) for 3 days in various combinations of IL-3, SCF and Epo. Differentiation potential was assayed by the percentage of cells positive for benzidine staining. Epo was added at either 3 U/ml or 1 U/ml. (**e**) Flow cytometric analysis of glycoprotein A/TER119 expression by iEBHX1S-4 cells cultured in the presence (+Dox) or absence (-Dox) of 1  $\mu\text{g/ml}$  doxycycline for 3 days in IL-3, SCF and Epo. +BIT, differentiation was carried out in the presence of 5% BIT. Iso, isotype control (black line). (**f**) RT-PCR gene expression analysis of iEBHX1S-4 cells cultured in the presence or absence of 1  $\mu\text{g/ml}$  doxycycline (Dox) as described above. EpoR, Epo receptor; c-kit, SCF receptor;  $\beta\text{H1}$ , embryonic  $\beta\text{H1}$ -globin;  $\beta\text{1}$ , adult  $\beta$ major-globin; GAPDH (glyceraldehyde-3-phosphate dehydrogenase), RT-PCR amplification and loading control. (**g**) Western blot analysis showing p27<sup>Kip1</sup> and p21<sup>Waf1/Cip1</sup> cyclin-dependent kinase inhibitor expression levels in iEBHX1S-4 cells cultured in the absence of doxycycline (Dox) for the indicated times (hours).

Supplementary Figure 3

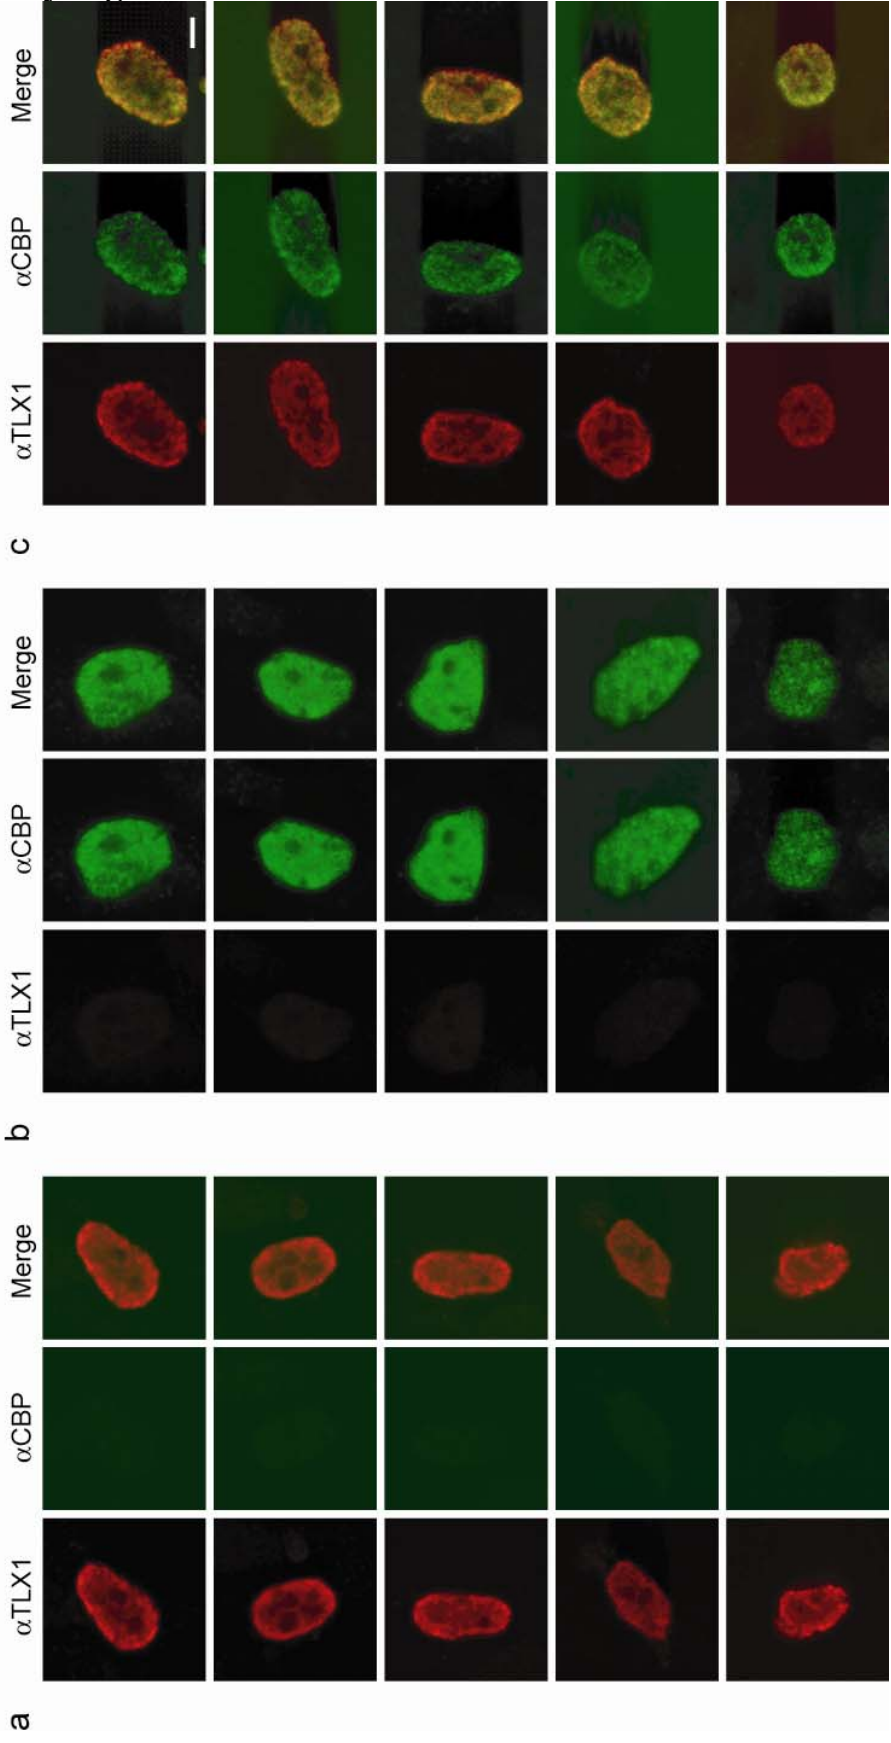

d

$\alpha$ TLX1

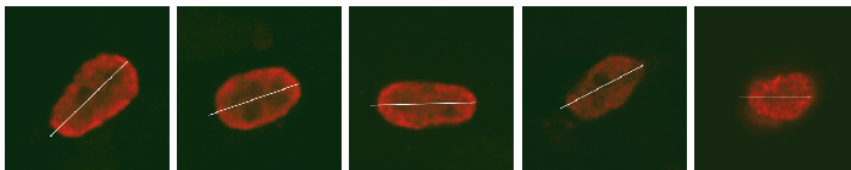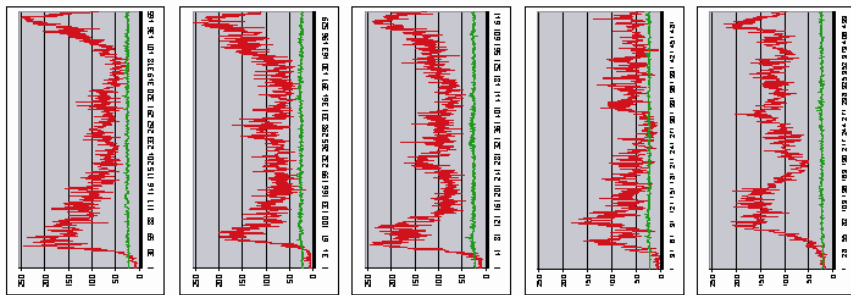

e

$\alpha$ CBP

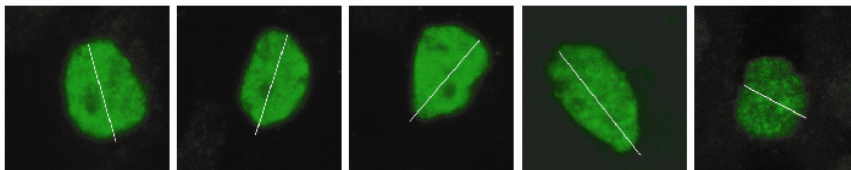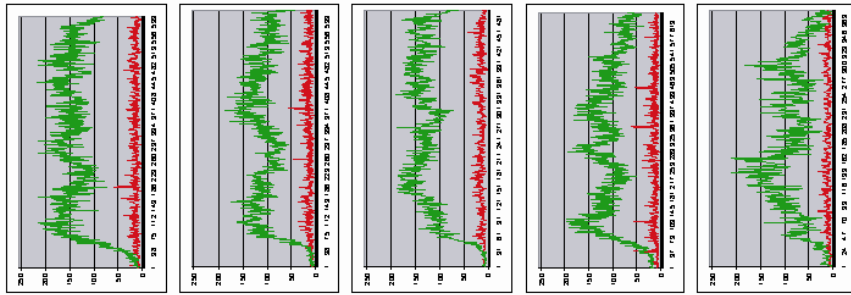

f

$\alpha$ TLX1/CBP

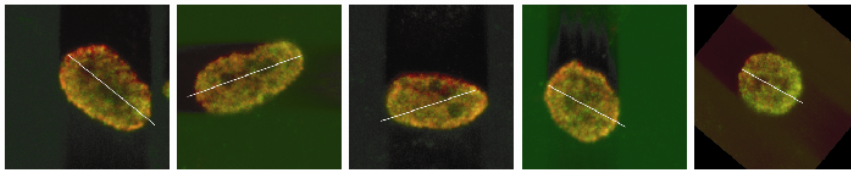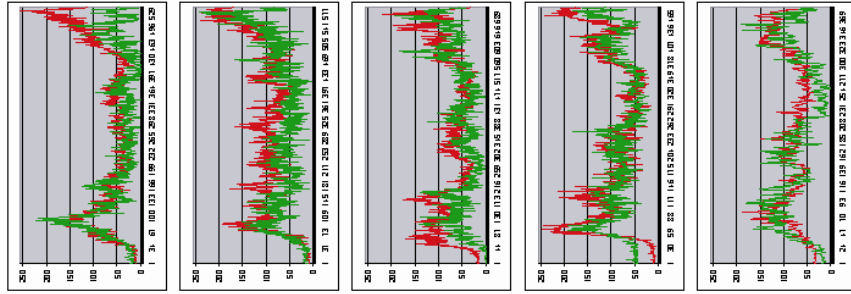

### Supplementary Figure 3 Legend

TLX1 interaction with CBP and colocalization in 293T cells. 293T cells transiently transfected with TLX1 **(a)**, CBP **(b)**, or TLX1 and CBP **(c)** expression vectors were labeled with anti-TLX1 ( $\alpha$ TLX1; Alexa Fluor 568, red) and anti-CBP ( $\alpha$ CBP; Alexa Fluor 488, green) antibodies, and immunofluorescence staining was analyzed by confocal laser scanning microscopy. The right panels show the merged green and red images at the same focal plane with overlapping regions of protein distribution appearing yellow. Size bar, 10  $\mu$ m. **(d)** Quantitative analysis of the images in **(a)** revealed that there was a statistically significant difference between the distribution of TLX1 in the peripheral versus the central region of the nucleus ( $P = 0.024$ ). **(e)** Quantitative analysis of the images in **(b)** revealed that there was no statistically significant difference between the distribution of CBP in the peripheral versus the central region of the nucleus ( $P = 0.328$ ). **(f)** When TLX1 was coexpressed with CBP **(c)**, a substantial fraction of CBP colocalized with TLX1 (Pearson correlation coefficient,  $r = 0.672$ ) preferentially relocalizing at the nuclear periphery ( $P = 0.001$ , peripheral versus central localization).
